## Running head: Peatland plants influence soil organic matter

1 **Title:** Plant organic matter inputs exert a strong control on soil organic matter decomposition in a  
2 thawing permafrost peatland

3 **Authors:** Rachel M. Wilson<sup>1\*</sup>, Moira A. Hough<sup>2</sup>, Brittany A. Verbeke<sup>1</sup>, Suzanne B. Hodgkins<sup>3</sup>, *IsoGenie*  
4 *Coordinators*, Jeff P. Chanton<sup>1</sup>, Scott D. Saleska<sup>2</sup>, Virginia I. Rich<sup>3</sup>, and Malak M. Tfaily<sup>2</sup>

5 <sup>1</sup>Florida State University, Earth Ocean and Atmospheric Sciences, Tallahassee Florida USA 32306

6 <sup>2</sup>University of Arizona, Department of Environmental Science, Tucson AZ USA 85721

7 <sup>3</sup>The Ohio State University, Department of Microbiology, Columbus OH USA 43210

8 *IsoGenie coordinators not named separately:* Gene Tyson<sup>4</sup>, Matthew B. Sullivan<sup>3</sup>, Eoin Brodie<sup>5</sup>, William J.  
9 Riley<sup>5</sup>, Ben Woodcroft<sup>4</sup>, Carmody McCalley<sup>6</sup>, Sky C. Dominguez<sup>2</sup>, Patrick M. Crill<sup>7</sup>, Ruth K. Varner<sup>8</sup>, Steve  
10 Frolking<sup>8</sup>, William T. Cooper<sup>9</sup>

11 <sup>4</sup>Queensland University of Technology, School of Biomedical Sciences, Brisbane Australia 4000

12 <sup>5</sup>Lawrence Berkeley Laboratory, Earth and Environmental Sciences, Berkeley, CA USA 94720

13 <sup>6</sup>Rochester Institute of Technology, Thomas H. Gosnell School of Life Sciences, Rochester NY, 14623

14 <sup>7</sup>Stockholm University, Department of Geological Sciences, Stockholm Sweden SE-100 44

15 <sup>8</sup>University of New Hampshire, Department of Earth Sciences and Institute for the Study of Earth,  
16 Oceans and Space, Durham New Hampshire USA 03824

17 <sup>9</sup>Florida State University, Department of Chemistry and Biochemistry, Tallahassee, FL 32306

18 co-corresponding authors: R.M.W. 117 N. Woodward Ave Tallahassee, FL 32306; rmwilson@fsu.edu

19 **Abstract.** Peatlands are a climate critical carbon (C) reservoir that will likely become a C source under  
20 continued warming. A strong relationship between plant tissue chemistry and the soil organic matter  
21 (SOM) that fuels C gas emissions is inferred, but rarely examined at the molecular level. Here we  
22 compared Fourier transform infrared (FT-IR) spectroscopy measurements of solid phase functionalities  
23 in plants and SOM to ultra-high-resolution mass spectrometric analyses of plant and SOM water extracts  
24 across a palsa-bog-fen thaw and moisture gradient in an Arctic peatland. From these analyses we  
25 calculated the C oxidation state (NOSC), a measure which can be used to assess organic matter quality.  
26 Palsa plant extracts had the highest NOSC, indicating high quality, while extracts of *Sphagnum*, which  
27 dominated the bog, had the lowest NOSC. The percentage of plant compounds that are less bioavailable  
28 and accumulate in the peat, increases from palsa (25%) to fen (41%) to bog (47%), reflecting the pattern  
29 of percent *Sphagnum* cover. The pattern of NOSC in the plant extracts was consistent with the high  
30 number of consumed compounds in the palsa and low number of consumed compounds in the bog.  
31 However, in the FT-IR analysis of the solid phase bog peat, carbohydrate content was high implying  
32 higher quality SOM. We explain this discrepancy as the result of low solubilization of bog SOM facilitated  
33 by the low pH in the bog which makes the solid phase carbohydrates less available to microbial  
34 decomposition. Plant-associated lignins and tannins declined in the unsaturated palsa peat indicating  
35 decomposition, but accumulated in the bog and fen peat where decomposition was presumably  
36 inhibited by the anaerobic conditions. A molecular-level comparison of the aboveground C sources and  
37 peat SOM demonstrates that climate-associated vegetation shifts in peatlands are important controls on  
38 the mechanisms underlying changing C gas emissions.

39 **Keywords:** peatland, climate change, greenhouse gas production, *Sphagnum*, soil organic matter,  
40 decomposition

## Running head: Peatland plants influence soil organic matter

### 41 Introduction

42 Climate-change induced warming, especially in the Arctic, will provoke a series of responses  
43 including changes to the overall plant community composition, individual plant primary productivity,  
44 microbial community, and individual microorganisms which culminate in the whole ecosystem response  
45 (Wardle et al., 2004). These interactions are complex and their interpretation is, in turn, complicated by  
46 the extreme complexity of the soil organic matter (SOM) that acts as the repository of plant derived  
47 substrates, inhibitory compounds, and microbially derived metabolic products. Understanding such  
48 interactions is critical because interactions between plants and the microbial community have a strong  
49 effect on the net release of the microbial respiration products CO<sub>2</sub> and CH<sub>4</sub> (Sutton-Grier and Megonigal  
50 2011).

51 Peatlands are a globally significant carbon (C) reservoir estimated at 530 ± 160 Pg (Hugelius et  
52 al., 2020) up to 1055 Pg (Nichols and Peteet 2019), representing 35-70% of planetary soil organic carbon  
53 (Lal 2010). Much of the high-latitude peatland C (277-800 Pg) is currently protected from decomposition  
54 as peatland permafrost (Tarnocai et al., 2009; Hugelius et al., 2014). Due to climate change, northern  
55 high latitudes are warming two to three times faster than the global average (Rintoul et al., 2018), which  
56 is causing permafrost to thaw (Christensen, 2014). Once thawed, the soil organic C is susceptible to  
57 microbial decomposition into the potent greenhouse gases (GHG) carbon dioxide (CO<sub>2</sub>) and, under  
58 water-logged anaerobic conditions, methane (CH<sub>4</sub>) (Schaedel et al., 2016; Chang et al., 2021). Many  
59 peatlands are active C sinks (Turetsky et al., 2007; Jones et al., 2013) or near-C neutral (Zoltai 1993,  
60 Euskirchen et al., 2012). The source or sink potential of a peatland depends on the balance between net  
61 C uptake by primary production and C loss via heterotrophic respiration, both of which can be affected  
62 by climate change. C uptake increases under a longer growing season (Natali et al., 2012), warming,  
63 drying (e.g., Malhotra et al., 2020) and changing plant community structure (e.g., Norby et al., 2019). C  
64 release via microbial respiration can be impacted by soil moisture (Blanc-Betes et al., 2016; Natali et al.,  
65 2015; Elberling et al., 2013), temperature (Hicks-Pries et al., 2013) and active layer depth (O'Donnell et  
66 al., 2011), as well as shifts in the quantity and quality of available organic matter (Treat et al., 2014;  
67 Hough et al., *in press*). Primary producers initially fix C and supply that C to the subsurface where it can  
68 be reworked by subsurface microorganisms. As the ultimate source of organic inputs to the peat, plants  
69 exert a strong control on SOM quantity and quality (Sutton-Grier and Megonigal 2011) which we  
70 hypothesize controls GHG production rates and their variation across thaw habitat types. Connecting  
71 the quality of aboveground C sources to differences in peat SOM is an essential step in testing the  
72 hypothesis that climate-associated vegetation shifts in peatlands influence changing C gas emissions.

73 Four major vegetation types dominate in high-latitude peatlands: bryophytes (mosses),  
74 graminoids (sedges), shrubs, and trees (Clymo 1987; Rodwell 1991). While warmer temperatures  
75 accelerate C loss from peat (Hopple et al., 2020; Hanson et al., 2020), this loss is greater when  
76 graminoids and shrubs dominate rather than *Sphagnum* mosses (Walker et al., 2016). *Sphagnum* is  
77 thought to suppress decomposition rates and thus GHG production by supplying poor-quality SOM (van  
78 Breeman 1995; Turetsky 2003), by microbial inhibition via acidification of the environment (Spearing  
79 1972), and by production of inhibitory phenolic compounds (Rudolph and Samland 1985; Williams et al,  
80 1998) and antimicrobial acids and sugar derivatives (Fudyma et al., 2019). Thus, environmental changes  
81 causing *Sphagnum* declines and increasing dominance by shrubs or sedges (e.g. McPartland et al., 2020;  
82 Norby et al., 2019; Walker et al., 2016; Johannson et al., 2006) is likely to result in more reactive and  
83 bioavailable SOM (Chanton et al., 2008; Tfaily et al., 2013; Wilson et al., 2021a). However, evidence has

## Running head: Peatland plants influence soil organic matter

84 also been presented that compounds associated with some shrubs inhibit SOM degradation (Wang et  
85 al., 2021; 2015). Sedges, such as *Carex* and *Eriophorum*, have been correlated with higher CH<sub>4</sub>  
86 production (Hines et al., 2008) and greater SOM reactivity (Chanton et al., 2008), thought to occur  
87 because sedges contain more cellulose, bioavailable N, and a higher proportion of labile compounds  
88 compared to *Sphagnum* (AminiTabrizi et al., 2020; Hodgkins et al., 2014, 2016). Graminoids also contain  
89 aerenchyma which are capable of transporting O<sub>2</sub> to the rhizosphere, potentially enhancing  
90 decomposition. In contrast, *Sphagnum* lack such tissues, thus *Sphagnum*-dominated habitats generally  
91 have lower O<sub>2</sub> availability providing a further thermodynamic constraint on SOM degradation in  
92 *Sphagnum*-dominated habitats.

93 Here, we investigate how permafrost thaw-driven changes in the quality of plant-derived  
94 organic matter influence SOM properties and thereby microbial decomposition. In this study, we analyze  
95 fresh plant material and peat collected from three habitat types across a thawing permafrost mire using  
96 the complementary techniques of Fourier Transform Infrared Spectroscopy (FT-IR) of solid phase  
97 material and Fourier Transform Ion Cyclotron Resonance Mass Spectrometry (FTICR-MS) of water  
98 extracts. These analyses will be used to assess (1) the quality of plant organic matter inputs in each of  
99 the three habitats, (2) which plant compounds accumulate as peat in each habitat type, and (3) the  
100 pathways by which plant-derived compounds are decomposed and how these differ across habitat  
101 types. Our assessments of organic matter quality will be used to determine how different plant types  
102 contribute to changes in SOM quality and drive GHG production rates across the thaw gradient. This  
103 information could be used to infer peatland-atmosphere feedback resulting from climate-driven shifts in  
104 plant community composition.

## 105 **Methods**

### 106 *Site Description*

107 Stordalen Mire (68.35°N, 19.05°E) is located in northern Sweden just north of the Arctic circle  
108 within the region of discontinuous permafrost. Climate change has accelerated thawing in the recent  
109 few decades leading to changes in hydrology and vegetation cover which have resulted in a patterned  
110 mosaic of habitat types within the mire (Johansson et al., 2006; Kokfelt et al., 2009); we focus here on  
111 the three dominant habitat types at the site: palsas, bogs, and fens. Some areas of the mire are still  
112 underlain by intact permafrost and elevated above the surroundings into relatively dry palsa plateaus.  
113 Warming has caused thawing of the permafrost in some areas causing, e.g., palsas to collapse and flood,  
114 producing wetter collapse features (Johansson et al., 2006). *Sphagnum* can infiltrate such pools,  
115 eventually elevating the surface enough to form a bog, or in some cases, the insulating effects of the  
116 *Sphagnum* are sufficient to allow the permafrost to refreeze. Alternatively, palsa can thaw completely  
117 and subside to the level of the surrounding water table, causing flooding and creating a fully-inundated  
118 fen. Fens are characterized by sedges and other aquatic vegetation (Zoltai 1993; Vitt et al., 1994;  
119 Jorgenson et al., 2001; Malmer et al., 2005), high CO<sub>2</sub> uptake, and the highest CH<sub>4</sub> emissions of the three  
120 habitat types (Hodgkins et al., 2014; McCalley et al., 2014). A bog, dominated by *Sphagnum*, can develop  
121 if the thawing permafrost collapses but remains above the local water table.

122 In addition to the hydrological differences, plant communities also change across this gradient  
123 of habitat types, from tundra-type vegetation dominated by shrubs, mosses, lichens, and small sedges in  
124 the dry palsa; to *Sphagnum* and small sedges in the bog; to tall sedges with some *Sphagnum* in the fen  
125 (Malmer et al., 2005). These differing plant communities likely contribute to differing SOM quality

## Running head: Peatland plants influence soil organic matter

126 (Chanton et al., 2008; AminiTabrizi et al., 2020; Hodgkins et al., 2014, 2016; Tfamily et al., 2013), leading to  
127 much higher overall CH<sub>4</sub> and CO<sub>2</sub> emission rates from fens as compared to bogs (Hodgkins et al., 2014)  
128 and the even-drier palsas (McCalley et al., 2014). Since the 1970's, the areal coverage of *Sphagnum*  
129 across the mire has declined significantly (Malmer et al., 2005), giving way to increased sedge cover as  
130 wetter conditions across the mire have increased the areal coverage of fen habitats (Kokfelt et al., 2009;  
131 Bäckstrand et al., 2010). This gradient in habitats across the mire creates a unique opportunity to  
132 explore changes in SOM quality with habitat transition within the context of changing greenhouse gas  
133 production rates.

134

### 135 *Plant Collection*

136 To explore differences in plant organic matter inputs across the three habitat types, samples of  
137 the characteristic species from each habitat (Malmer 2005) were collected. Water extracts from the  
138 whole plants and tissue types (leaves, stems, roots) were used to compare organic matter inputs  
139 composition across the different plant types. Plant-associated compounds were then compared to the  
140 peat from each habitat to understand what compounds were easily decomposed (i.e., which compounds  
141 stimulated microbial activity) versus those compounds that were less bioavailable and that tended to  
142 accumulate in the peat. Plants were collected during the peak of the growing season (early August) in  
143 2014 resulting in the following samples for each habitat: palsa – *Rubus chamaemorus*, *Betula nana*,  
144 *Empetrum nigrum*, *Andromeda polifolia*, *Dicranum elongatum*, *Eriophorum vaginatum*, fruticose lichen  
145 of unknown species; bog – *Sphagnum spp.*; fen – *Eriophorum angustifolium*, *Carex rostrata*. Whole plant  
146 samples were collected and separated by tissue type (roots, stems, and leaves), then immediately flash-  
147 frozen in liquid N<sub>2</sub> and kept frozen at -20°C until processing in February 2015. Since mosses do not have  
148 root, stem, and leaf differentiation, they were not separated and were processed as whole plants.  
149 Additional plant samples for FT-IR analysis were collected in August 2015 and included *Sphagnum*  
150 *fuscum*, *S. magellanicum*, *E. nigrum*, *A. polifolia*, and an unknown species of lichen. These samples were  
151 similarly flash frozen in the field in liquid N<sub>2</sub> and then kept at -20°C until analysis.

### 152 *Peat Collection*

153 Peat was collected in August 2014, from the same three habitats along the thaw gradient where  
154 plants were collected, using a Wardenaar corer (Eijkelpamp, Raleigh, NC USA). The cores were sectioned  
155 by depth, placed in Teflon coated vials, and frozen at -20°C before analysis. On returning to the lab, peat  
156 samples were freeze dried and ground to a homogenous powder using a SPEX SamplePrep 5100  
157 Mixer/Mill ball grinder. Porewater was also collected from the site using a perforated stainless-steel  
158 tube inserted into the peat to the desired depth. Gentle suction was applied using a gas tight syringe  
159 fitted to the tube using a three-way valve. Once 30 mL of porewater was obtained, it was placed in a  
160 polycarbonate sample vial and frozen at -20°C prior to analysis. An additional 30 mL of porewater was  
161 collected in three locations within 1 m of the core for replicate pH analysis immediately in the field.  
162 Samples were collected from the shallowest depth it was possible to draw porewater: 10-14 cm in the  
163 bog and 1-5 cm in the fen. We used the solid peat to compare the compounds present in the palsa,  
164 where the conditions are not water saturated and no porewater could be collected, to the other sites  
165 where water saturation has already effectively extracted dissolved compounds from the peat. A list of  
166 sample types and the number of samples analyzed by each method are given in Supplemental Table 1.

**Running head:** Peatland plants influence soil organic matter

167 *Fourier Transform Infrared Spectroscopy (FT-IR)*

168 To examine the bulk chemical characteristics of the plants and solid peat, the dried and ground  
169 material were analyzed by Fourier Transform Infrared Spectroscopy (FT-IR). For FT-IR, only stems and  
170 leaves from each plant were available for analysis (no roots). Recent advances in FT-IR analysis allow us  
171 to quantitatively evaluate differences in carbohydrates and aromatic compounds among samples  
172 (Hodgkins et al., 2018). FTIR spectra were collected using a PerkinElmer Spectrum 100 FTIR  
173 spectrometer fitted with a Csi beam splitter and a deuterated triglycine sulfate detector. Transmission-  
174 like spectra were obtained using a Universal ATR accessory with a zinc selenide/diamond composite  
175 single-reflectance system. Each sample was placed directly on the ATR crystal, and force was applied so  
176 that the sample came into good contact with the crystal. Spectra were acquired in % transmittance  
177 mode between 4000 and 650  $\text{cm}^{-1}$  (wavenumber) at a resolution of 4  $\text{cm}^{-1}$ , and four scans were  
178 averaged for each spectrum. The standard deviations of carbohydrate and aromatic carbon values were  
179 within 5% of the mean values when 4 replicate samples were run and scanned four times. That is, if a  
180 sample was found to be 30% carbohydrate, the analytical error on 4 aliquots that were each scanned 4  
181 times was 1.5%. Spectra were ATR-corrected, baseline-corrected, and then converted to absorbance  
182 mode using the instrument software. Area-normalized and baseline-corrected peak heights for common  
183 classes of compounds observed in SOM were calculated using the methods and script described by  
184 Hodgkins et al., (2018), expanded to include peak assignments by Palozzi and Lindo (2017).

185 *Fourier Transform Ion Cyclotron Resonance Mass Spectrometry (FTICR-MS)*

186 We used Fourier Transform Ion Cyclotron Resonance Mass Spectrometry (FTICR-MS) to gain a  
187 higher resolution view of the compounds present in the palsa peat, peat porewater from the bog and  
188 fen, and the plant samples. Plant samples were thawed and each tissue type (roots, stems, and leaves  
189 when available), in addition to whole plant samples for mosses, which lack leaf/stem/root  
190 differentiation, were analyzed after water extraction in which 0.5 g of undried plant material was shaken  
191 in 4 mL nanopure water and then allowed to sit for 2 hours, and the supernatant decanted. The  
192 resulting extracts were mixed 1:2 with HPLC-grade methanol and immediately direct-injected into a 12 T  
193 Bruker ESI-FTICR-MS spectrometer operating in negative mode. Solid peat samples (from an 8-18 cm  
194 deep section at each site) were analyzed after water-extracting the dried and ground peat samples. For  
195 this method, 0.5 g of the dried and ground peat, which is expected to yield 25 mg C, was added to 1 mL  
196 of degassed deionized water and then placed on a shaker for 2 hours. The solutions were then  
197 centrifuged to form a pellet and the supernatant was decanted. The supernatant and porewater  
198 samples were then each mixed 1:2 (by volume) with HPLC grade methanol, and the resulting solutions  
199 were injected through direct injection onto a 12 T Bruker ESI-FTICR-MS spectrometer operating in  
200 negative mode. For each sample, ninety-six individual scans were averaged and then internally  
201 calibrated using organic matter homologous series separated by 14 Da (i.e.,  $\text{CH}_2$  groups). The mass  
202 measurement accuracy was <1 ppm for singly charged ions across a broad  $m/z$  range (i.e.,  $200 < m/z <$   
203  $1200$ ). Chemical formula assignments were made using an in-house built software program following  
204 the Compound Identification Algorithm, described by Kujawinski and Behn (2006) and modified by  
205 Minor et al., (2008) and based on the following 'Golden Rules' criteria: signal/noise > 7, and mass  
206 measurement error < 1 ppm, taking into consideration the presence of C, H, O, N, S and P and excluding  
207 other elements. All observed ions in the spectra were singly charged based on identification of 1.0034  
208 Da spacing found between carbon isotopologues of the same molecule (e.g., between  $^{12}\text{C}_n$  and  $^{12}\text{C}_{n-1}-$   
209  $^{13}\text{C}_1$ ). Two technical replicates were collected for most samples and, when available, peaks present in

## Running head: Peatland plants influence soil organic matter

210 either (or both) spectra were combined and the signal intensities were averaged for downstream  
211 analysis.

212           Complex organic matter such as both the plant extracts and the peat are expected to result in  
213 thousands, if not tens of thousands, of unique compounds by FTICR-MS. A number of approaches exist  
214 to aid in visualizing such complex datasets. These include the use of van Krevelen diagrams that depict  
215 the H/C vs. O/C ratios of individual compounds, which enables tentative inferences about general  
216 compounds classes. For example, lipids are generally low O/C with high H/C, while carbohydrates  
217 generally fall in the region near O/C = 1 and H/C = 2. In addition, the molecular formulae derived from  
218 FTICR-MS analyses can be used to calculate the nominal oxidation state of the carbon (NOSC) in  
219 individual compounds observed in the DOM. This is done through a simple calculation from the  
220 molecular formula  $NOSC = 4 - (4C + H - 3N - 2O + 5P - 2S)/C$  (Keiluweit et al., 2016), but provides  
221 tremendous insight into the thermodynamic energy yield on oxidation of that C (La Rowe and van  
222 Cappellin 2011), which is directly relevant to understanding organic matter quality (Wilson and Tfaily  
223 2018).

### 224 *Chemical transformation Analysis*

225           Chemical transformation analysis of the chemical compounds identified by FTICR-MS involves  
226 calculating the mass differences between individual compounds and matching those mass differences to  
227 specific chemical moieties. By matching these results with known biochemical transformations  
228 accomplished by microorganisms in the environment, it is possible to infer the decomposition pathways  
229 by which individual compounds are degraded and produced (e.g., Stenson et al., 2003; Kujawinski et al.,  
230 2016; Wilson et al., 2017). This process is possible because of the extremely high mass resolution of the  
231 FTICR-MS technique which allows us to narrow down the possible matches within 1 ppm. The current  
232 database of microbial transforms contains 186 unique transforms (Wilson et al., 2017), including  
233 hydroxylation, methoxylation, and transamination reactions.

234

## 235 **Results**

236 The pH for the porewater at the bog surface averaged  $4.2 \pm 0.2$ . In the fen, the porewater pH at the  
237 surface averaged  $5.6 \pm 0.4$ . No porewater was available in the surface palsa for collection.

238

### 239 *FT-IR*

240           The leaf and stem FT-IR spectra were quite similar for both vascular plants (*E. nigrum*, *A.*  
241 *polifolia*) in the palsa habitat, with the exception that *A. polifolia* leaves had lower carbohydrate content  
242 and *E. nigrum* leaves had lower carboxylic acid content and aliphatic waxes compared to stems from the  
243 same plant (Figure 1; Supplemental Table 2). Because of the similarity between leaf and stem spectra for  
244 each plant and because of expected higher turnover of leaves compared with stems, we compared the  
245 FT-IR spectra from the leaves of the dominant plants to the peat in each habitat type (Figure 1). High  
246 peak intensities were observed at wavenumbers corresponding to carbohydrates (i.e., O-alkyls at  $1030$   
247  $\text{cm}^{-1}$ ); lignin ( $1265 \text{ cm}^{-1}$ ); humic acids ( $1426 \text{ cm}^{-1}$ ); phenolic lignin-like structures ( $1515 \text{ cm}^{-1}$ ); protein-like  
248 ( $1550 \text{ cm}^{-1}$ ); aromatics ( $1650 \text{ cm}^{-1}$ ); C=O stretching associated with carboxylic acids, aldehydes ketones

**Running head: Peatland plants influence soil organic matter**

249 and other oxygenated moieties ( $1720\text{ cm}^{-1}$ ); and aliphatic fats ( $2920\text{ cm}^{-1}$  and  $2850\text{ cm}^{-1}$ )(Supplemental  
 250 Table 2). In the palsa, the two depths of peat were very similar, with deeper peat having a slightly higher  
 251 aromatic, carboxylic acid, and waxy lipid content relative to the shallower peat (Figure 1d). The  
 252 carbohydrate content of the palsa peat was lower than the *S. fuscum* and lichens. The waxy lipids, peaks  
 253  $2850\text{ cm}^{-1}$  and  $2920\text{ cm}^{-1}$ , were extremely well differentiated in the leaves of *E. nigrum* and *A. polifolia*  
 254 compared to the leaves of *S. fuscum* and lichens (Figure 1a).

255 In the bog, *Sphagnum* mosses and *E. vaginatum* leaf and bog peat FT-IR spectra were compared  
 256 (Figure 1b,e). The waxy lipid peaks at  $2850$  and  $2920\text{ cm}^{-1}$  were slightly more differentiated in the *E.*  
 257 *vaginatum* compared to the *Sphagnum*, consistent with higher waxy lipid content in *E. vaginatum*. The  
 258 leaf carboxylic acid peak ( $1720\text{ cm}^{-1}$ ) was stronger in the *Sphagnum* compared to the *E. vaginatum*. The  
 259 bog peat had the highest humic acid content of any of the sites (Supplemental Table 2).

260 In the palsa, *E. vaginatum* had the highest leaf aromatic content (Supplemental Table 2). In the  
 261 FT-IR spectra of the peat from the different habitats (Figure 1d, e, f) several absorption bands typical of  
 262 humic materials were observed in our samples (Artz et al., 2008; Chapman et al., 2001; Leifeld et al.,  
 263 2012). The bog peat had the highest carbohydrate content of any of the sites. The fen peat had a higher  
 264 abundance of protein-like structures and lower abundance of carboxylic acids compared to the other  
 265 sites. Aliphatics ( $2920\text{ cm}^{-1}$  and  $2850\text{ cm}^{-1}$ ) were much less well defined in the bog peat compared to the  
 266 other sites, indicating fewer waxy lipids (Artz et al. 2008; Coccozza et al. 2003) compared to the other  
 267 sites. Comparisons between the shallow and deep peat (Figure 1d,e,f) at each site indicated differences  
 268 in decomposition among the habitats. Carbohydrates, protein-like structures, and aromatics became  
 269 less pronounced with depth in the fen, while aliphatic waxes increased and humic acids decreased with  
 270 depth in the bog.

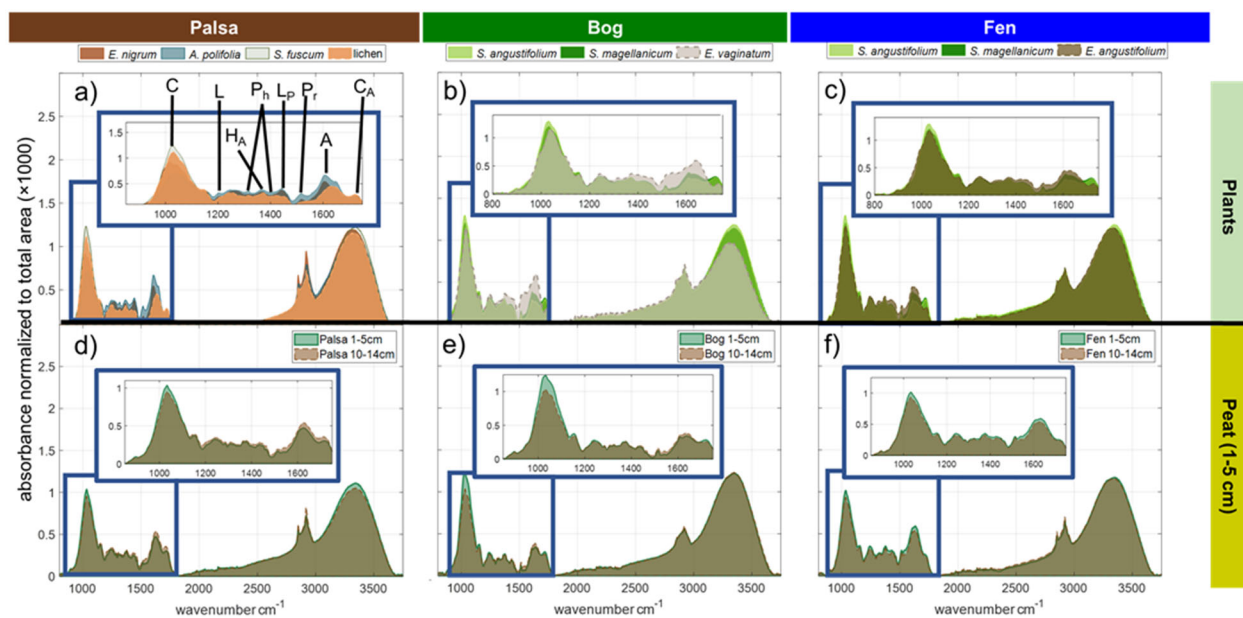

271  
 272 Figure 1: Layered FT-IR spectra comparing dominant plants (leaf material only) and peat in each habitat.  
 273 All spectra are baseline-corrected and normalized to total peak area as described in Hodgkins et al.,  
 274 (2018). Inset plots enlarge the  $850\text{--}1750\text{ cm}^{-1}$  region where many chemical functional groups exist within  
 275 a short span of wavenumbers. In the panel (a) inset, important peaks discussed in the text are marked: C

## Running head: Peatland plants influence soil organic matter

276 = carbohydrates, L = lignin, H<sub>A</sub> = humic acids, P<sub>h</sub> = phenolic-lignin, L<sub>p</sub> = lignin-like, P<sub>r</sub> = proteinaceous, A =  
277 aromatics, C<sub>A</sub> = carboxylic acids. Panel (a) shows the overlaid spectra for lichens, *A. polifolia*, *E. nigrum*,  
278 and *S. fuscum*, the dominant plant types in the palsa, while palsa peat spectra are shown in panel (d).  
279 Panel (b) shows the overlaid spectra for the bog's dominant plants *S. angustifolium*, *S. magellanicum*,  
280 and *E. vaginatum*, with the bog peat in panel (e). Panel (c) shows the fen's dominant plants, *E.*  
281 *angustifolium*, *S. angustifolium*, and *S. magellanicum*, which are reflected in fen peat in panel (f).

282

### 283 FTICR-MS Results

284 Among all of the plant samples, leaves, stems, and roots combined we observed 19,072  
285 compounds via FTICR-MS. Of those, we were able to assign a molecular formula to 14,260 compounds  
286 (75%), which is a typical assignment rate for complex SOM. Across all habitats in the peat, we observed  
287 15,198 unique compounds of which we were able to assign molecular formulae to 11,254 (74%). Palsa  
288 plants had the highest diversity of compounds (n = 11,633, Figure 2). Of those, the majority of  
289 compounds were not present in the peat (75%) suggesting that they were microbially decomposed  
290 and/or processed. The remaining 25% were present in the peat, suggesting that they are resistant to  
291 microbial decay and accumulate over time (Figure 2). The bog plants had the lowest diversity of  
292 compounds (n = 3578) but they also appeared to be the most resistant to microbial decomposition as  
293 47% were observed in the bog peat. The fen was intermediate between the palsa and bog with fen  
294 plants having 5312 compounds of which 41% were observed to accumulate in the peat (Figure 2).

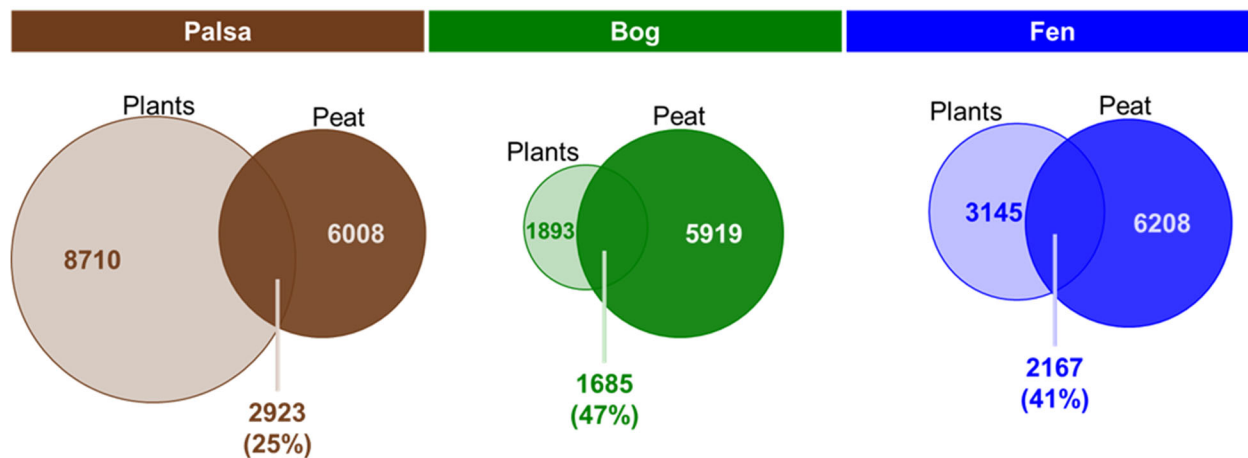

295

296 Figure 2: Comparison of compounds in plant extracts (leaf, roots, stems, and whole mosses combined)  
297 and in the shallow peat. Numbers in each circle indicate the number of different compounds identified  
298 by FTICR-MS that are unique to either the plants or peat collected from each habitat, while shared  
299 compounds are indicated by the overlapping regions (with numbers directly below, and the percentage  
300 of plant compounds these represent). We refer to these overlap-region compounds as “accumulated”  
301 because they are plant-derived and appear resistant to microbial decomposition, persisting in the peat.

302 We compared the compounds observed in the composite plant extracts (leaves only, or whole  
303 plants for lichens and mosses) to those in the shallow peat from each habitat type (Figure 3) (The  
304 supplement contains comparisons of the stem extracts from the palsa, Supp. Fig. 1, and root extracts to  
305 the peat for each habitat, Supp. Fig. 2). There were striking differences in the plant leaf compounds as



## Running head: Peatland plants influence soil organic matter

306 well as the peat across the different habitats (Figure 3). The plant composite in the fen (including  
 307 extracts of *E. angustifolium*, and *C. rostrata*) had low numbers of lipid-like (fatty acids) and protein-like  
 308 compounds relative to the dominant plants from the palsa (lichens, *A. polifolia*, and *E. nigrum*) and bog  
 309 (*Sphagnum* and *E. vaginatum*) and habitats (Figure 3). Both the bog and fen peat had relatively more  
 310 tannin-like compounds compared to the palsa peat despite having lower abundances of these  
 311 compounds in their plant composites relative to the palsa.

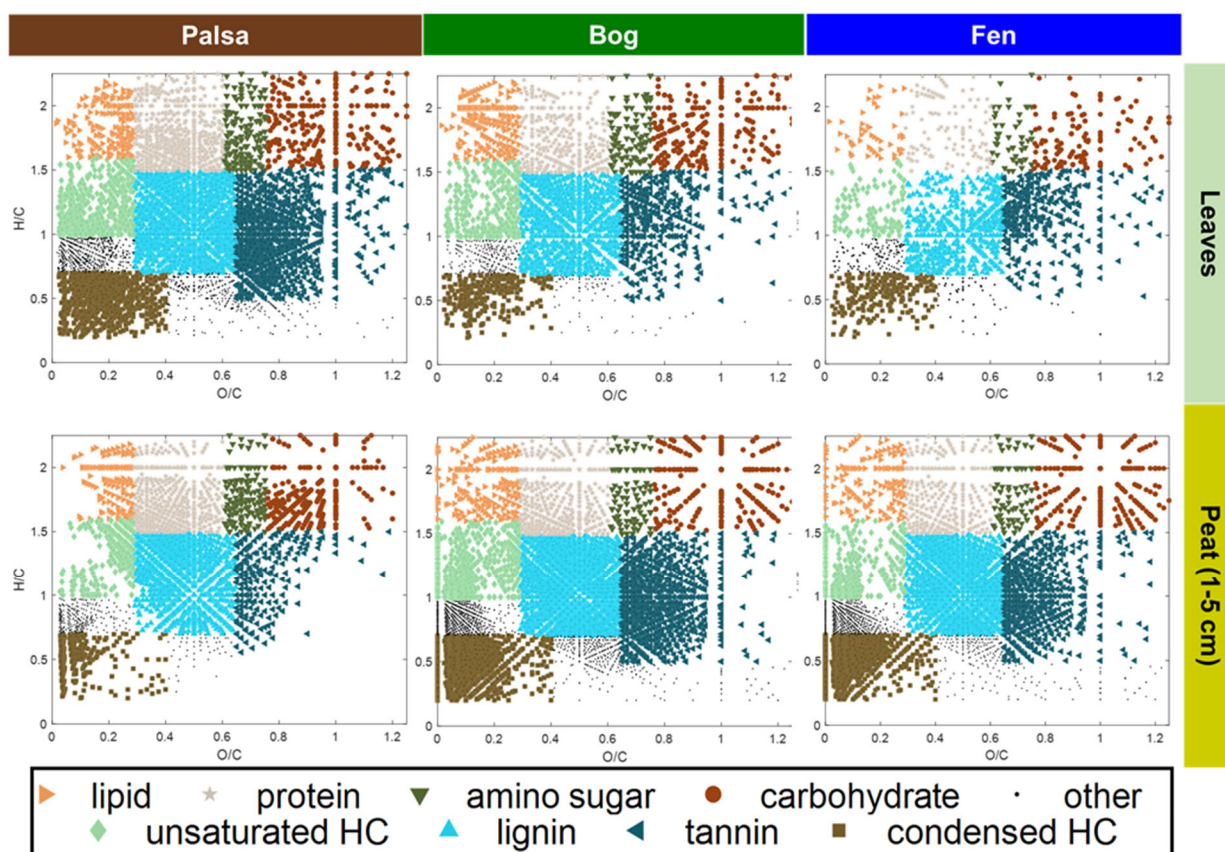

312  
 313 Figure 3: The combined FTICR-MS of the dominant plant species' leaves (or for mosses and lichens, the  
 314 entire plant) and near-surface (1-5 cm) peat extracts from each habitat. Dominant plants for the palsa  
 315 were lichens, *A. polifolia*, and *E. nigrum*; for the bog *Sphagnum* and *E. vaginatum*; and for the fen *E.*  
 316 *angustifolium* and *C. rostrata*. Each point represents an observed molecular formula, and is categorized  
 317 by color and symbol according to inferred compound classes.

318  
 319 We calculated the nominal oxidation state of the carbon (NOSC) in the water extracts of the  
 320 dominant plant leaves (whole plants for lichens, *Sphagnum*) from each habitat (Figure 4) as a metric for  
 321 determining organic matter quality (Wilson and Tfaily 2018). Lichens, *A. polifolia*, and *E. nigrum*  
 322 together comprise 31% of the aboveground leaf, 95% of aboveground stem, and 22% of the  
 323 belowground (root) biomass in the palsa. *Sphagnum* accounts for 74% of the biomass in the bog overall,  
 324 with *E. vaginatum* contributing 13% of the bog's aboveground and 20% of the belowground biomass. In  
 325 the fen, *E. angustifolium* is 63% of the aboveground and 81% of the belowground biomass, while *C.*  
 326 *rostrata* contributes approximately 5% of the above and belowground biomass. *Sphagnum* had the

### Running head: Peatland plants influence soil organic matter

327 lowest NOSC of any of the habitat-dominant plants (Figure 4). *E. angustifolium*, in the fen, had  
328 intermediate NOSC values that were nevertheless significantly higher than those found in *Sphagnum*.  
329 The palsa plant community was more diverse, lichens had the highest NOSC values and *E. nigrum* and *A.*  
330 *polifolia* had significantly higher NOSC values than *Sphagnum*.

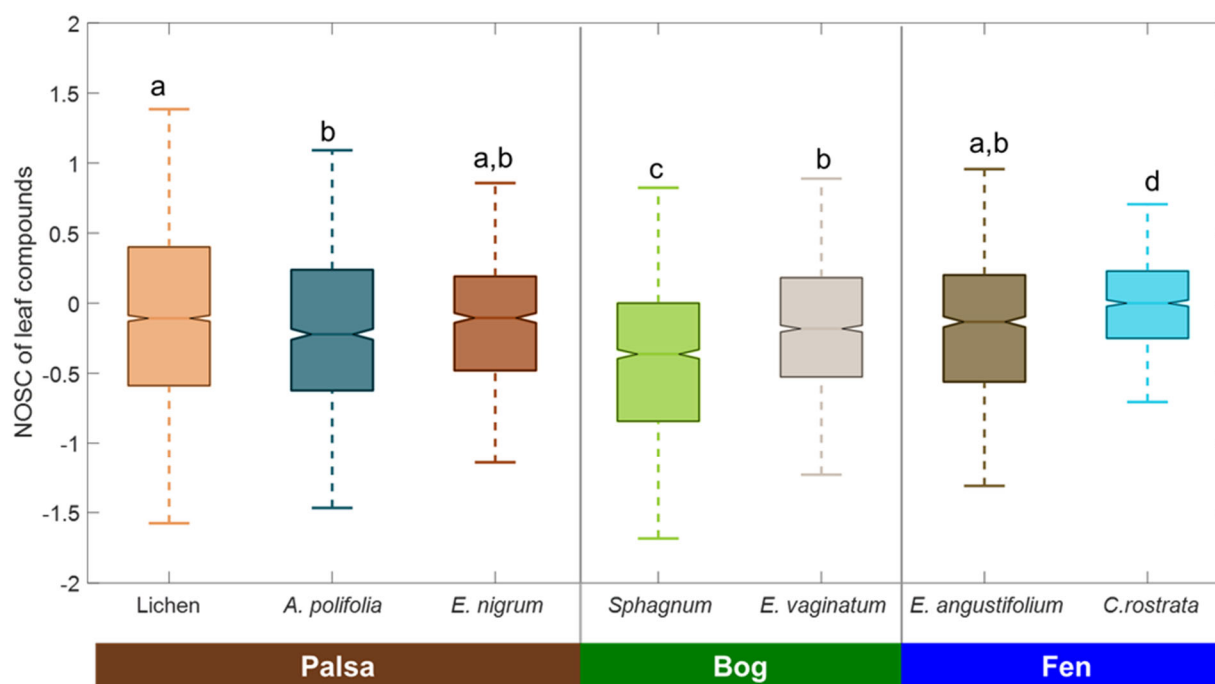

331  
332 Figure 4: Nominal oxidation state of carbon (NOSC) for dominant plant leaf extracts (whole plants for  
333 lichens, *Sphagnum*) from each habitat. Different lowercase letters above bars indicate significant  
334 differences by ANOVA followed by pairwise comparison (Tukey's Honestly Significant Difference).

335 It is possible that the average NOSC was being disproportionately influenced by a large number  
336 of compounds with extreme NOSC values, but that were present at overall low concentration. To  
337 determine whether this was the case, we calculated the normalized signal intensity for each compound  
338 in the composite of all plant parts (leaves, stems, and roots combined) from all plants collected in each  
339 habitat. We plotted the cumulative normalized signal intensity against the NOSC of the compounds  
340 (Figure 5) and found that compounds with NOSC < 0 accounted for 46% of the signal intensity in the  
341 palsa, 71% of the signal intensity in the bog, and 58% of the signal intensity in the fen. Although not  
342 strictly quantitative within similar sample types, signal intensity roughly follows concentration in  
343 samples with similar overall matrices.

## Running head: Peatland plants influence soil organic matter

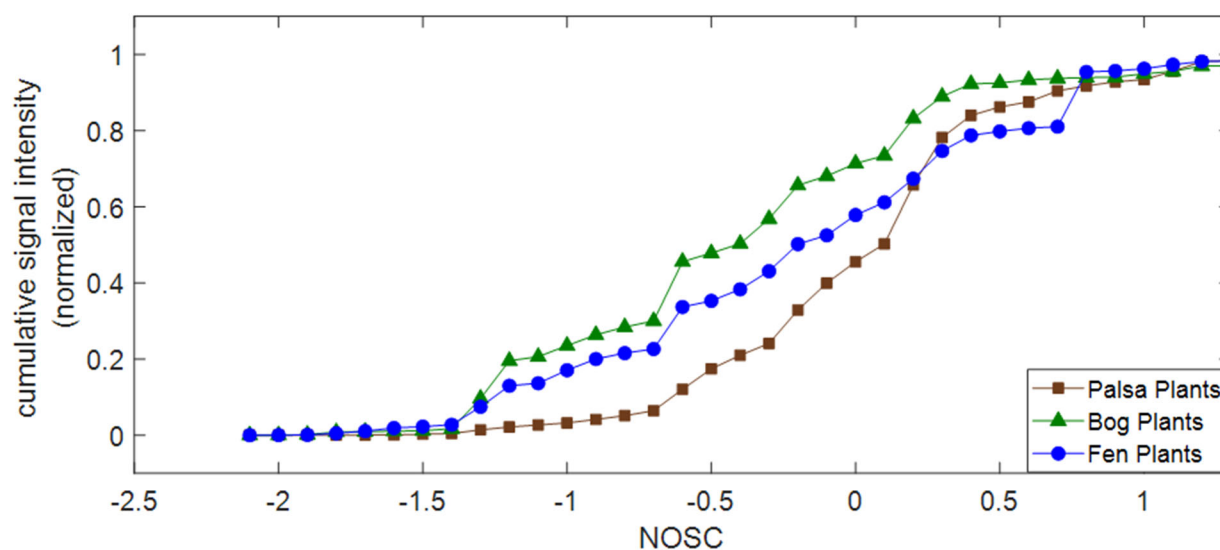

344  
345 Figure 5: Cumulative signal intensity normalized to total intensity as a function of NOSC in the composite  
346 plant samples from each habitat.

347 We then examined the characteristics of the plant-associated compounds that were either (1)  
348 consumed or that (2) accumulated in the peat as well as the compounds in the peat that were not  
349 present in the original plant material and were therefore assumed to be (3) microbially produced (Figure  
350 6). Consumed compounds are those that appear in the plant extracts but not in the peat suggesting that  
351 they were decomposed. Accumulated compounds appear in both the plants and the peat, apparently  
352 resistant to decay. Some compounds appear only in the peat suggesting that they were produced during  
353 decomposition presumably by microbial processes, although abiotic production is also possible (Fudyma  
354 et al., 2020). This comparison is sensitive to even minor abundance plant compounds, for example,  
355 compounds could appear to be produced if they came from a minor species that was not included in the  
356 plant mixture. To minimize this effect, we included all plant parts (leaves, stems, and roots) from all  
357 plant species sampled at a given habitat (regardless of abundance) to compare against the peat  
358 compounds. In the palsa, this included: lichens, *A. polifolia*, *E. nigrum*, *D. elongatum*, *R. chamaemorus*,  
359 and *B. nana*. In the bog this included *Sphagnum*, *E. vaginatum*, and *E. angustifolium*. In the fen this  
360 included *E. angustifolium*, *C. rostrata*, and *Sphagnum*. In the palsa, tannins, lignins, condensed  
361 hydrocarbons, and carbohydrates were more readily consumed compared to the bog and fen. In  
362 contrast, a higher percentage of the total lipid content was consumed in the bog and fen compared to  
363 the palsa. In the palsa a lower percentage of the lignins, tannins, and condensed hydrocarbons  
364 accumulated in the peat (Figure 6) suggesting that the higher redox in the palsa facilitated the  
365 decomposition of these types of compounds. Compared to palsa, a high proportion of condensed  
366 hydrocarbons, tannins, and lignins appeared in the bog and fen (Figure 6 c) peat. In addition to  
367 unclassified ('other') compounds, a high proportion of protein-like compounds were produced in the  
368 palsa compared to the other sites (Figure 6 c).

**Running head: Peatland plants influence soil organic matter**

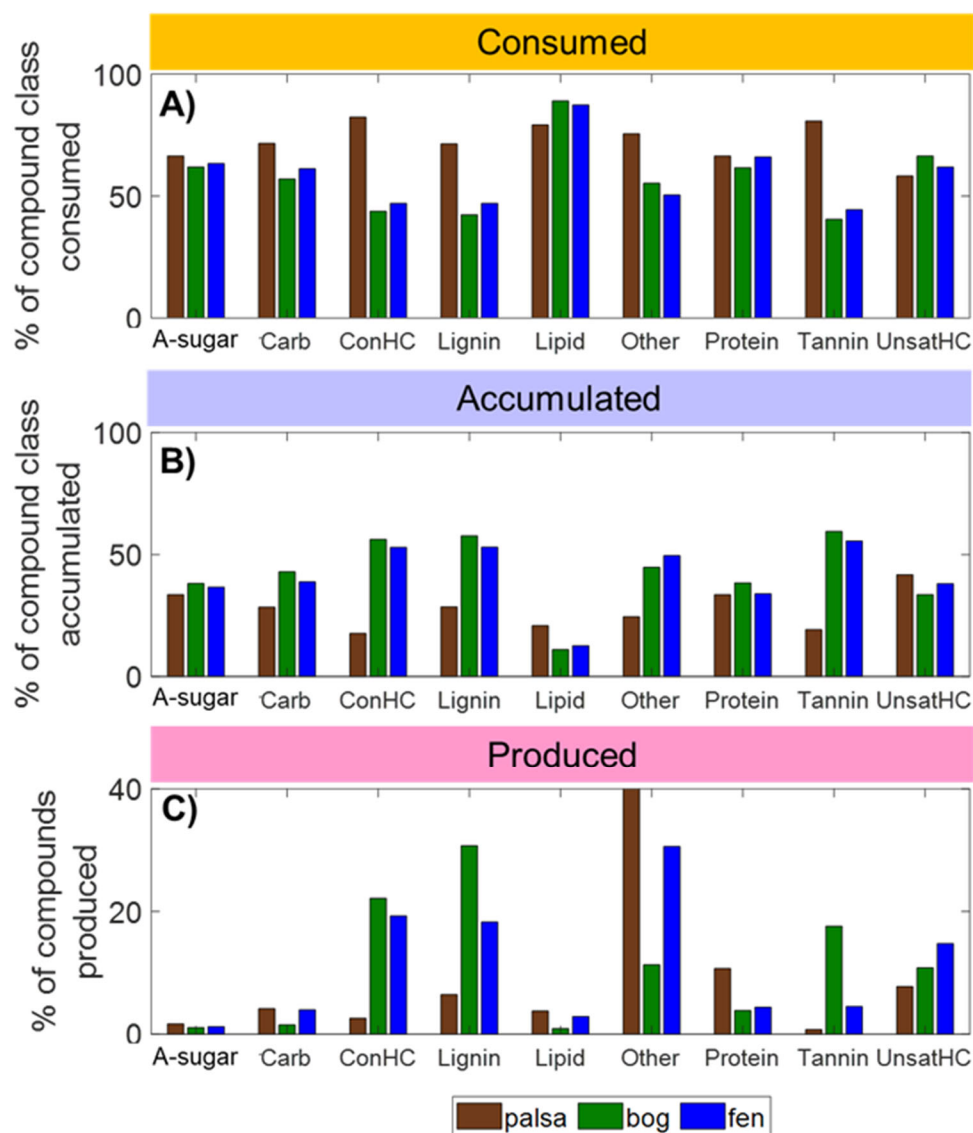

369  
 370 Figure 6: Inferred percentages of consumed, accumulated, and produced compounds within the peat  
 371 extracts, by chemical class (inferred from the molecular formulae from FT-ICR MS, per Figure 3), for each  
 372 habitat. (A) Percentage of consumed compounds, calculated as the number of consumed compounds in  
 373 each class divided by the total number of compounds in that class originally present in the plant  
 374 extracts. (B) Percentage of accumulated compounds, calculated as the number of plant compounds of  
 375 each class that were also present in the peat, divided by the total number of compounds in that class  
 376 originally present in the plant extracts. (C) Percentage of produced compounds, calculated as  
 377 compounds present in the peat but absent from the plant material, and are inferred to be microbially  
 378 produced, divided by the total number of compounds in the peat. Note that the maximum y-axis value  
 379 in (C) was set to 40% to improve visualization of differences; the only produced class that exceeded 40%  
 380 was the unclassified “other” compounds at 62.5% in the palsa.

**Running head: Peatland plants influence soil organic matter**

381 We also examined the nitrogen (N), sulfur (S), and phosphorus (P) content of the various  
 382 compounds (Figure 7). Overall, the plants in the fen had a higher proportion of both nitrogen and sulfur  
 383 containing compounds compared to the plants in either the bog or palsa. In the bog, a higher  
 384 percentage of nitrogen-containing compounds was consumed relative to either the fen or the palsa  
 385 (Figure 7). Additionally, when compared to the proportions present originally in the plants, a higher  
 386 percentage of N- and S-containing compounds were consumed in the bog. A higher percentage of CHO-  
 387 only compounds accumulated in the fen compared to the starting plant material suggesting that N-, S-,  
 388 and P-containing compounds were preferentially consumed. A high percentage of the produced  
 389 compounds in the palsa were CHO-only compounds and very few phosphorus or sulfur containing  
 390 compounds were produced. This result contrasts with the bog and fen where phosphorus and sulfur  
 391 containing compounds were ~40% of the total compounds produced.

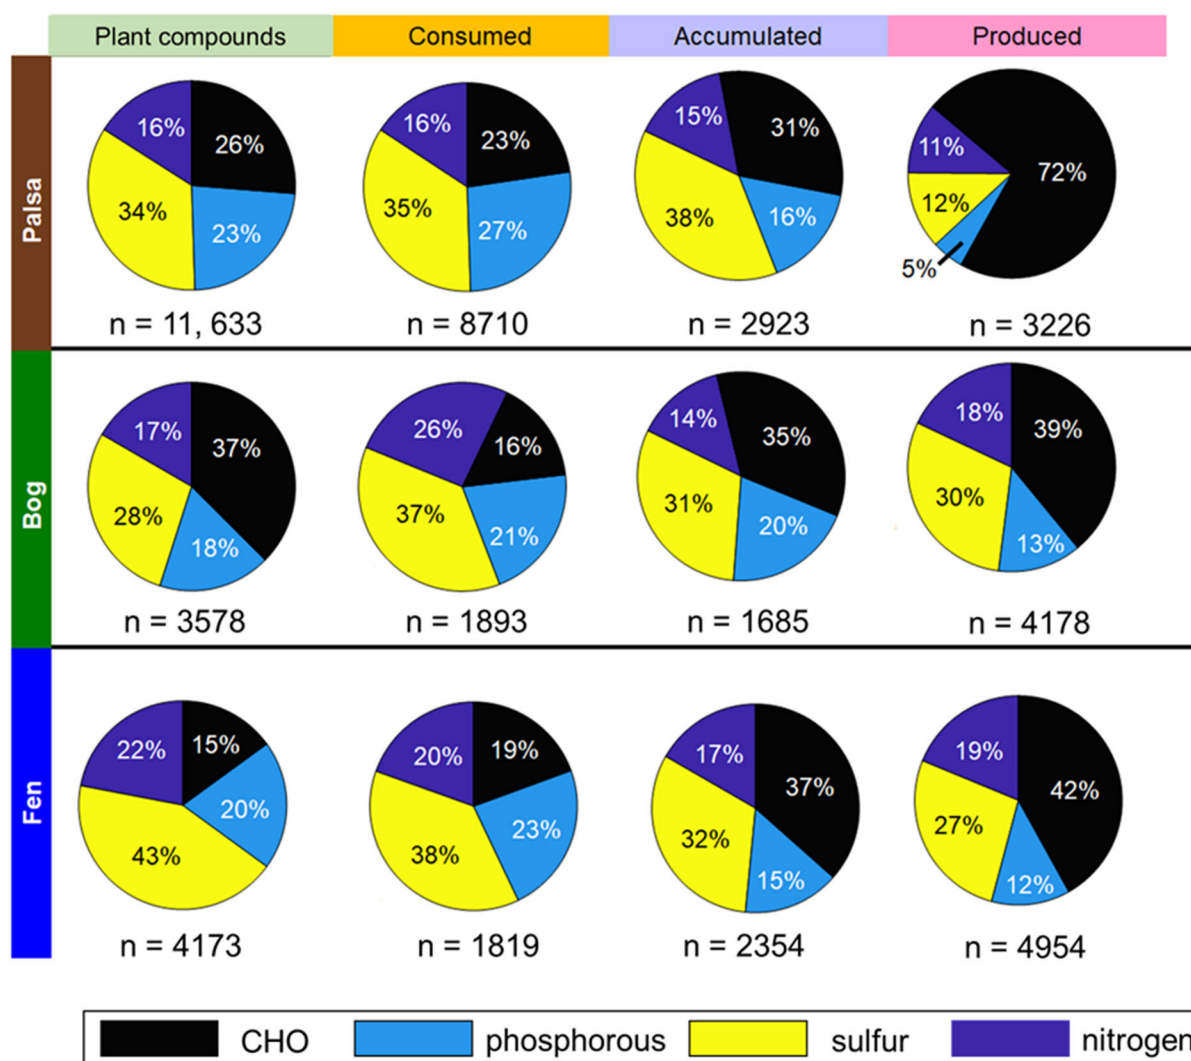

392  
 393 Figure 7: The proportion of compounds that were exclusively CHO or that contained N, S, or P, in each  
 394 habitat, for total plant compounds (for leaves, stems, and roots of the plants collected in each habitat),  
 395 and those inferred to have been consumed, accumulated, or produced in the peat. Percentages the  
 396 number of compounds in each category, divided by the total number of compounds in the group (n)  
 397 indicated under each chart.

## Running head: Peatland plants influence soil organic matter

398 To understand potential differences in the decomposition pathways among the three habitats  
399 that have contributed to the differences observed in the produced compounds, we calculated the  
400 number of times each transform (i.e., chemical transformation pathways by which SOM decomposes)  
401 occurred within a sample in the peat and plotted the most frequently observed transforms from each  
402 site (Figure 8). Hydrogenation ( $H_2$ ) was the most frequent transform for all of the habitat types.  
403 Demethylation followed by oxidation ( $CH_2-O$ ) was the second most frequent for the palsa and fen, but  
404 side-chain (de)methylation ( $CH_2$ ) was second for the bog. Transformations involving changes of N (OH-N,  
405 O-NH, and  $NH_3-O$ ) were highest in the palsa.

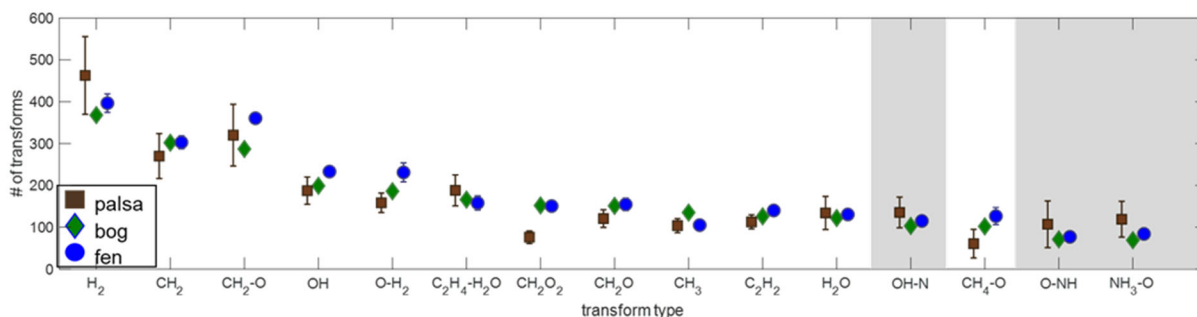

406  
407 Figure 8: Top transforms for each habitat's peat given as the molecular differences among compounds  
408 (i.e.,  $H_2$  refers to a difference of 2 hydrogen atoms). Points are plotted as averages  $\pm$  1 s.d. for 3 samples  
409 of palsa, and for 2 samples of fen; one sample was available for bog. Transforms involving nitrogen are  
410 highlighted in gray.

411

## 412 Discussion

413 In our investigation of changes in plant and soil organic material (SOM) composition along a  
414 permafrost thaw gradient, we observed a strong relationship between the plant-derived organic  
415 compounds and SOM compounds suggesting that aboveground vegetation and roots shape  
416 belowground processes and subsequent SOM decomposition in this peatland. Across the thaw gradient,  
417 there were significant changes in  $CO_2$  and  $CH_4$  production potential (Hodgkins et al., 2014) and emissions  
418 (McCalley et al., 2014). The palsa was associated with net  $CO_2$  emission and little, or no,  $CH_4$  production,  
419 the bog and fen both exhibit net  $CO_2$  uptake, and  $CH_4$  emissions from the fen were the highest of the  
420 three habitat types (Bäckstrand et al., 2010; McCalley et al., 2012).  $CO_2:CH_4$  ratio production potentials,  
421 clearly indicated that the fen was the most methanogenic of the three sites (Hodgkins et al., 2014).

422 Hodgkins et al. (2014) found that differences in the major SOM classes drove variability in  
423 greenhouse gas (GHG) emissions across the mire. In particular, they ascribed increasing GHG emissions  
424 across the thaw gradient to increasing SOM lability as inferred from decreasing C/N ratios and lower  
425 molecular weight, aromaticity, organic acid, and organic oxygen contents. Our results support that  
426 conclusion and further show that differences in SOM are driven by changes in the plant community,  
427 confirming the central role of plants in controlling SOM quality. The plant community is the initial source  
428 of the organic matter to the subsurface (Sutton-Grier and Megonigal, 2011). Microbial decomposition  
429 then removes some chemical species while creating others, thereby modifying the inputs in a way that is  
430 partially dependent on oxygen availability within each habitat. *Sphagnum* plays a particularly strong role  
431 in habitats where this species dominates. Organic matter in *Sphagnum* extracts has significantly lower

## Running head: Peatland plants influence soil organic matter

432 NOSC than other abundant plant species (Figure 4). Such low NOSC is consistent with low organic matter  
433 quality (Wilson and Tfaily 2018) suggesting a mechanism for suppressed SOM decomposition in the bog,  
434 especially as compared to the fen. In addition, *Sphagnum* produces many compounds that are  
435 potentially inhibitory to microbial activity (Fudyma et al. 2020) including organic acids which result in  
436 lower pH in the bog relative to the fen habitat. All of these factors work synergistically to facilitate C  
437 storage in *Sphagnum*-dominated environments. The percentage of plant compounds that accumulate in  
438 the peat, and are therefore less bioavailable, increases from palsa (25%) to fen (41%) to bog (47%)  
439 (Figure 2), which is opposite to the trend in plant species diversity across the habitats. *Sphagnum* limits  
440 decomposition rates by producing low NOSC compounds (Figure 4), producing microbially inhibitory  
441 compounds (Fudyma et al., 2020), but it appears that these effects of *Sphagnum* can be attenuated by  
442 increasing proportional cover of other plant species.

443 The high carbohydrate peak in the FT-IR analysis of the bog peat relative to the other habitats  
444 (Figure 1) was unexpected, particularly since CO<sub>2</sub> production potential is low in the bog (Hodgkins et al.,  
445 2014) and carbohydrates are a highly bioavailable C source that should stimulate production. However,  
446 the high carbohydrate content of the bog peat is consistent with other observations that sugars tend to  
447 accumulate in *Sphagnum*-dominated peat (AminiTabrizi et al., 2020), and that the hydrolytic enzymes  
448 responsible for the initial breakdown of carbohydrates are less active in bog peat relative to the other  
449 habitat types (Woodcroft et al., 2018). Analysis of the solid phase (FT-IR) bog peat revealed high  
450 abundance of bioavailable carbohydrates, however, the FTICR-MS analysis revealed low quality organic  
451 matter in the water-soluble fraction. This implies that the availability of labile C in the bog is, in part,  
452 limited by solubilization of the cell walls, likely due to the low pH in the bog (pH = 4.2) which is known to  
453 inhibit DOM hydrolysis (Curtin et al., 2016). The high relative abundance of the carboxylic acid peak in  
454 the solid *Sphagnum* (Figure 1) is consistent with the high abundance of carboxylated sugars and uronic  
455 acids that comprise the structural components of *Sphagnum* cell walls (Painter 1991; Ballance et al.,  
456 2007) which could explain the relatively high carbohydrate peak in the solid bog peat as well as the  
457 lower pH in the bog relative to the fen.

458 In the fen, FT-IR results show a greater reduction in the intensities of nearly all of the important  
459 functionalities with depth of the peat compared to any of the other habitats (Figure 1f) which we  
460 conclude reflects higher decomposition rates. In both the palsa and fen it appears that decomposition  
461 rapidly follows organic matter deposition, based on the low abundance of carbohydrates even in the  
462 shallow peat relative to the available plants. In contrast, the bog peat intensities are quite similar to  
463 those of the *Sphagnum*, suggesting that the organic matter has changed (decomposed) little following  
464 deposition. This result is consistent with the lower GHG emissions in the bog relative to fen (McCalley et  
465 al., 2014; Hodgkins et al., 2014) and the supposition that bog SOM is less bioavailable than fen SOM.

466 We found a high abundance of waxy lipids in the leaves of *E. nigrum* and *A. polifolia* from the  
467 palsa (as seen in the strong differentiation between the 2850 cm<sup>-1</sup> and 2920 cm<sup>-1</sup> FT-IR peaks; Figure 1a)  
468 (Artz et al. 2008; Coccozza et al. 2003). While these compounds are frequently thought to be refractory,  
469 they do not appear as strongly even in the shallow peat, suggesting that they are at least partially  
470 degraded following deposition. Alternatively, because the leaves of *E. nigrum* and *A. polifolia* are very  
471 small and evergreen, they are likely underrepresented in the peat since they don't all drop in the fall  
472 (unlike the deciduous plants in the habitat). The low differentiation between these peaks in the lichen is  
473 consistent with lichens lacking the waxy cuticle that coats plant leaves. The low relative abundance of

## Running head: Peatland plants influence soil organic matter

474 carbohydrates in the palsa peat relative to the abundant plant species is consistent with fast  
475 decomposition in the surface depleting highly bioavailable compounds soon after deposition.

476 While FT-IR is practical for looking at overall changes of functional groups in the bulk solid-phase  
477 SOM, FTICR-MS provides finer-resolution detail of the water-extractable compounds, down to the  
478 individual molecular level. Overall, we observed fewer unique compounds in peat samples relative to  
479 the plant sample set as determined by FTICR-MS (15,198 vs 19,072 respectively). This result is consistent  
480 with loss of compounds with decomposition of the plant material following deposition. The percent of  
481 plant compounds that were also found in the peat increased from palsa (25%) to fen (41%) to bog (47%)  
482 (Figure 2). This pattern suggests that a higher percentage of plant compounds were decomposed in the  
483 palsa so that they are no longer detectable. The apparently higher decomposition in the palsa occurs  
484 even though the palsa also has the greatest number of different compounds of all the sites. The richness  
485 (i.e., number) of compounds observed in the plants across the different habitat types (Figure 2) follows  
486 the same pattern as the plant species diversity changes across the sites: palsa > fen > bog (Hough et al.,  
487 2020; Johansson et al., 2006). Interestingly, this trend is opposite that observed in the diversity of the  
488 plant-associated microbial communities across these sites (Hough et al., 2020; Wilson et al., 2021b).  
489 Nevertheless, the richness of compounds in the peat is similar across the different habitats, which  
490 suggests that a high diversity of microbial pathways in the bog and fen is responsible for transforming  
491 the less diverse plant matter into more diverse peat.

492 While there is considerable overlap in common compounds between the peat and the dominant  
493 plant types found within each habitat, many of the plant compounds were not found in the peat, while  
494 the peat also had many unique compounds not found in the plants. These results indicate both loss and  
495 production of novel compounds following plant organic matter deposition, presumably through the  
496 metabolic action of microorganisms. Only 25% of compounds from the palsa plant composite were also  
497 observed in the shallow peat (Figure 2), indicating that 75% of plant compounds were either consumed  
498 or metabolically processed into other molecules and that the plants in the palsa were largely  
499 bioavailable and susceptible to decomposition. It is likely that the higher lability (as inferred from NOSC)  
500 of the dominant plant compounds (Figure 4) contributes to the greater decomposition of organic matter  
501 from palsa plants. Additionally, the higher availability of oxygen as a terminal electron acceptor (TEA) in  
502 the palsa compared to the other sites could catalyze the decomposition of a range of bioavailable  
503 compounds in the palsa relative to the other habitats. The higher oxygen content could explain why  
504 hard to decompose chemical classes such as tannins, lignins, and condensed hydrocarbons, which  
505 accumulate in the bog and fen, are more readily consumed in the palsa (Figure 6).

506 In highly oxygenated environments, production of CO<sub>2</sub> is thermodynamically favored, but in  
507 anoxic, TEA-depleted, waterlogged environments, CO<sub>2</sub> is sometimes the only available TEA, resulting in  
508 CH<sub>4</sub> production. Plants exert a strong influence on the CO<sub>2</sub>:CH<sub>4</sub> ratio by being the prime source of  
509 organic substrates (i.e., electron donors) in the subsurface (Meronigal et al., 2004; Sutton-Grier and  
510 Meronigal 2011), and by controlling the availability of TEAs used in decomposing that organic matter.  
511 There is a strong relationship between NOSC calculated from the molecular formula and the  
512 thermodynamic catabolic energy yield on oxidation of that C (LaRowe and van Cappellin 2011;  
513 Keiluweit et al., 2016), and that energy yield is a measure of organic matter quality (Wilson and Tfaily  
514 2018). Natural organic matter typically has NOSC values ranging from -4 to +4 with corresponding  $\Delta G^{\circ}_{c}$   
515  $\Delta G^{\circ}_{ox}$  ranging from -54 to +174 kJ (mol C)<sup>-1</sup>, which suggests that most organic matter oxidation must be  
516 coupled to an energy yielding reduction in order to become thermodynamically feasible. Oxygen is



## Running head: Peatland plants influence soil organic matter

517 capable of oxidizing compounds along the full range of NOSC values with enough energy to produce  
518 ATP. Thus, OM decomposition in the aerobic palsa is unlikely to be thermodynamically inhibited,  
519 although some evidence suggests that NOSC influences decomposability in aerobic environments as well  
520 (Graham et al., 2017). However, in the bog and fen where inundation creates anaerobic conditions and  
521 where the availability of other alternative terminal electron acceptors (such as Fe(III) or sulfate) is low,  
522 decomposition becomes thermodynamically limited, resulting in the accumulation of compounds with  
523 lower NOSC values such as fatty acids, waxes, and lignin.

524 While the palsa has higher oxygen availability than the other two sites, which could contribute  
525 to higher decomposition rates, the higher NOSC values of the dominant palsa plant compounds (Figure  
526 4) are consistent with the palsa plant material also being inherently easier to decompose, regardless of  
527 the available TEAs (Keiluweit et al., 2016). The high bioavailability of palsa plants, particularly lichens  
528 (Figure 4) is contrary to generally accepted ideas that the sedges, abundant in the fen, should be the  
529 most easily biodegradable (Malmer et al 2005). The rate of litter input in the fen is highest of any of the  
530 habitats and could be faster than the microbial community can process, leading to a build-up of  
531 otherwise biologically attractive substrates (Malmer et al 2005). Similar classes of compounds  
532 accumulate in the bog and fen and both habitats have high production of condensed hydrocarbons,  
533 lignins and tannins compared to the palsa (Figure 6 B). These compounds are unlikely to be produced  
534 microbially, but are more probably due to increased (abiotic) leaching in the waterlogged bog and fen  
535 sites.

536 Nutrient limitation is a possible control of SOM decomposition in peatlands. While it has been  
537 shown that *Sphagnum*-dominated peatlands are nitrogen-limited (Bragganza et al., 2006), we also found  
538 evidence that dominant plants in the bog habitat are also lower in S relative to the plants from other  
539 habitats (Figure 7). This result is consistent with measurements of bulk S in the litter (Hough et al., in  
540 review) and suggests that S is limiting. In support of this hypothesis, the consumed compounds in the  
541 bog were disproportionately S-containing compounds (37% vs. 28% S in the original plant material;  
542 Figure 7). Consistent with the understanding of N limitation, the consumed compounds in the bog were  
543 also disproportionately N-containing compounds (26% vs. 17% in the original plant material; Figure 7). In  
544 contrast to the palsa, where the majority (72%) of putatively microbially produced compounds did not  
545 contain either N, S, or P (i.e., produced compounds were largely CHO-only), both the bog and fen peats  
546 had relatively large percentages of produced compounds containing these critical heteroatoms. The  
547 correlation among N and S containing compounds would be consistent with the production of microbial  
548 proteins. In other peatlands, climate effects such as warming have been associated with increases in  
549 microbial peatland cycling (Wilson et al., 2021a). Increases in the nitrogen content of decomposing peat  
550 have been observed in other studies from enhanced C losses during decomposition (Leifeld et al., 2020).  
551 The large percentages of produced compounds with N, S, and P suggest potential organic S and P cycling  
552 occurring in the anaerobic habitats.

553 We examined the mechanisms by which compounds are decomposed, and found that palsa has  
554 the highest overall number of transforms (i.e., potential mechanisms by which the SOM is being  
555 degraded), probably reflecting the diversity of aerobic pathways, but the fen also has a higher number  
556 of transforms compared to the bog (Figure 8). Higher numbers of transforms in the fen relative to the  
557 bog are consistent with the higher diversity of compounds in the fen plant litter stimulating microbial  
558 activity and creating a more active system. Additionally, inhibitory compounds in the bog could limit  
559 microbial activity, thereby suppressing the number of transforms utilized. In particular, the fen has a

## Running head: Peatland plants influence soil organic matter

560 higher frequency of (de)hydrogenation (H<sub>2</sub>), hydroxylation (OH), demethylation followed by oxygenation  
561 (CH<sub>2</sub>-O), and dehydrogenation followed by oxidation (O-H<sub>2</sub>). Dehydrogenation and demethylation  
562 followed by oxidation (net transform: CH<sub>4</sub>-O) are common mechanisms of lignin decomposition (Stenson  
563 et al., 2003). Finding that these reactions are more prevalent in the fen than in the bog is consistent with  
564 the low lignin content of bog plants (i.e., *Sphagnum*) compared with the dominant fen plants  
565 (*Eriophorum*). Surprisingly, CH<sub>4</sub>-O is less prevalent in the palsa, where we would expect high rates of  
566 lignin decomposition due to the abundance of lignin-rich woody vegetation. Additionally, the palsa had  
567 the most diverse consumption of lignin-like compounds (Figure 6) and, in contrast to the other habitats  
568 studied, the palsa is well-oxygenated in the surface layer, which should promote the activity of the  
569 lignin-degrading enzyme phenol oxidase (Freeman et al., 2001; Sinsabaugh 2010). The FT-IR results also  
570 suggest more lignin content in the palsa plants relative to the dominant plants in the fen (Figure 1 a,c),  
571 but lower lignin content in the palsa peat relative to the fen peat, which also suggests decomposition of  
572 lignin is occurring in the fen. To reconcile these apparently conflicting results, we hypothesize that in the  
573 palsa, the greater oxygen availability allows faster, multi-step decomposition of lignin in the plant litter,  
574 such that the surface peat had already lost much of the lignin or its decomposition products; whereas in  
575 the fen, lignin decomposition is occurring (as inferred from the number of transforms), but is slowed by  
576 oxygen limitation. An alternate explanation is that although the plants are woody, litter input in any year  
577 comes mostly from the leaves, so the woody biomass has less effect on the peat.

578 Several transforms involving exchanges with N were important, particularly in the palsa,  
579 including oxygen or hydroxyl exchange with N, NH, or NH<sub>3</sub> (Figure 8). These sorts of transforms are  
580 expected to occur when intermediates of N-fixation interact with SOM (Thorn et al., 1992, 2016; Thorn  
581 and Mikita 2000). The higher frequency of these N-involving transforms in the palsa could be related to  
582 the abundance of lichens, which are significant nitrogen-fixers in locations where herbaceous nitrogen-  
583 fixing plants are less abundant (Gunther 1989). In contrast, the mechanisms of decomposition as  
584 inferred from transform abundance in the wetter anaerobic habitats seem to be more similar to each  
585 other than either is to the drier palsa.

586 Mechanisms of organic matter decomposition differed between the palsa and the other  
587 habitats, but were similar between the two inundated sites suggesting that the quality of plant-derived  
588 inputs to the soil in permafrost systems influences SOM accumulation and decomposition below ground,  
589 as modified by environmental factors such as pH and oxygen availability. Shifts in plant communities in  
590 response to climate change have a profound effect on SOM composition through changing inputs. This  
591 composition in turn shapes decomposition, ultimately influencing GHG production. Nevertheless,  
592 peatlands are unique habitats in that they have a rich abundance of C but low abundance of terminal  
593 electron acceptors meaning that they are thermodynamically, yet not C, limited. Other climate forcings  
594 such as drought, which have the potential to alter the availability of TEAs, will therefore have a  
595 disproportionate influence in peatlands where an abundance of low-quality C is available for  
596 decomposition if the correct thermodynamic requirements are met.

597

## 598 Acknowledgments

599 Funding for this research was provided by the Genomic Science Program of the United States  
600 Department of Energy Office of Biological and Environmental Research Grants DE-SC0010580 &  
601 DESC0016440. We also acknowledge funding from the National Science Foundation for the EMERGE

**Running head: Peatland plants influence soil organic matter**

602 Biology Integration Institute, NSF Award # 2022070. All data published in this manuscript is publicly  
 603 accessible via the IsoGenie database <https://isogenie-db.asc.ohio-state.edu/>. We have no conflicts of  
 604 interest to declare.

605

606 **Competing Interests Statement**

607 The authors have no competing interests to declare.

608

609

|                                 | GPS Coordinates            | FT-IR | FTICR-MS |
|---------------------------------|----------------------------|-------|----------|
| <b>Plants</b>                   |                            |       |          |
| <i>E. angustifolium</i> roots   |                            |       | 2        |
| <i>E. angustifolium</i> leaf    |                            |       | 2        |
| <i>E. angustifolium</i> (whole) |                            | 1     |          |
| <i>A. polifolia</i> . roots     |                            |       | 2        |
| <i>A. polifolia</i> . leaf      |                            | 1     | 1        |
| <i>A. polifolia</i> . stem      |                            | 1     | 1        |
| <i>R. chamaemorus</i> . leaf    |                            | 1     | 2        |
| <i>R. chamaemorus</i> . stem    |                            | 1     | 1        |
| <i>R. chamaemorus</i> . roots   |                            |       | 2        |
| <i>E. nigrum</i> . roots        |                            | 1     | 2        |
| <i>E. nigrum</i> . leaf         |                            | 1     | 1        |
| <i>E. nigrum</i> . stem         |                            | 1     | 1        |
| <i>B. nana</i> . leaf           |                            |       | 1        |
| <i>B. nana</i> . stem           |                            | 1     | 1        |
| <i>B. nana</i> . roots          |                            |       | 2        |
| <i>S. fuscum</i>                |                            | 1     |          |
| <i>S. angustifolium</i>         |                            | 1     |          |
| <i>S. magellanicum</i>          |                            | 1     |          |
| <i>Sphagnum</i> spp             |                            |       | 1        |
| <i>E. vaginatum</i> roots       |                            |       | 2        |
| <i>E. vaginatum</i> leaf        |                            |       | 2        |
| <i>E. vaginatum</i> (whole)     |                            | 1     |          |
| Lichen                          |                            | 1     | 2        |
| <b>Peat</b>                     |                            |       |          |
| Palsa 1-5cm                     | N 68 21.1959 E 019 02.7974 | 1     | 3        |
| Palsa 10-14cm                   | N 68 21.1959 E 019 02.7974 | 1     |          |
| Bog 1-5cm                       | N 68 21.1973 E 019 02.8537 | 1     |          |
| Bog 10-14cm                     | N 68 21.1973 E 019 02.8537 | 1     | 1        |
| Fen 1-5cm                       | N 68 21.1992 E 019 02.8063 | 1     | 1        |
| Fen 10-14cm                     | N 68 21.1992 E 019 02.8063 | 1     | 1        |

610

611 Supplemental Table 1: List of Samples. Numbers indicate the number of samples analyzed by the  
 612 indicated method.

Running head: Peatland plants influence soil organic matter

613

|                             | carbohydrates<br>(1030 cm <sup>-1</sup> ) | aromatics<br>(1650 cm <sup>-1</sup> ) | lignin<br>(1265 cm <sup>-1</sup> ) | aliphatic wax <sup>2</sup><br>(2850 cm <sup>-1</sup> ) | aliphatic wax <sup>1</sup><br>(2920 cm <sup>-1</sup> ) | lignin-like<br>(1515 cm <sup>-1</sup> ) | phenolic lignin<br>(1371 cm <sup>-1</sup> ) | carboxylic<br>acids (1720<br>cm <sup>-1</sup> ) | phenolics<br>(1440 cm <sup>-1</sup> ) | humic acids<br>(1426 cm <sup>-1</sup> ) | proteinaceous<br>(1550 cm <sup>-1</sup> ) | organic acids<br>(1700 cm <sup>-1</sup> ) |
|-----------------------------|-------------------------------------------|---------------------------------------|------------------------------------|--------------------------------------------------------|--------------------------------------------------------|-----------------------------------------|---------------------------------------------|-------------------------------------------------|---------------------------------------|-----------------------------------------|-------------------------------------------|-------------------------------------------|
| Plants                      |                                           |                                       |                                    |                                                        |                                                        |                                         |                                             |                                                 |                                       |                                         |                                           |                                           |
| <i>E. angustifolium</i>     | 1.05                                      | 0.24                                  | 0.15                               | 0.12                                                   | 0.07                                                   | 0.06                                    | 0.06                                        | 0.09                                            | 0.02                                  | 0.01                                    | 0.00                                      | 0.00                                      |
| <i>A. polifolia. leaf</i>   | 0.56                                      | 0.30                                  | 0.08                               | 0.19                                                   | 0.12                                                   | 0.08                                    | 0.06                                        | 0.12                                            | 0.11                                  | 0.02                                    | 0.00                                      | 0.00                                      |
| <i>A. polifolia. stem</i>   | 1.01                                      | 0.26                                  | 0.20                               | 0.21                                                   | 0.13                                                   | 0.09                                    | 0.08                                        | 0.17                                            | 0.03                                  | 0.02                                    | 0.00                                      | 0.00                                      |
| <i>R. chamaemorus. leaf</i> | 0.01                                      | 0.00                                  | 0.00                               | 0.00                                                   | 0.00                                                   | 0.00                                    | 0.00                                        | 0.00                                            | 0.00                                  | 0.00                                    | 0.00                                      | 0.00                                      |
| <i>R. chamaemorus. stem</i> | 0.01                                      | 0.00                                  | 0.00                               | 0.00                                                   | 0.00                                                   | 0.00                                    | 0.00                                        | 0.00                                            | 0.00                                  | 0.00                                    | 0.00                                      | 0.00                                      |
| <i>E. nigrum. leaf</i>      | 0.82                                      | 0.27                                  | 0.10                               | 0.28                                                   | 0.20                                                   | 0.05                                    | 0.07                                        | 0.11                                            | 0.12                                  | 0.03                                    | 0.00                                      | 0.00                                      |
| <i>E. nigrum. stem</i>      | 0.92                                      | 0.27                                  | 0.23                               | 0.53                                                   | 0.43                                                   | 0.09                                    | 0.10                                        | 0.31                                            | 0.03                                  | 0.02                                    | 0.00                                      | 0.00                                      |
| <i>B. nana. stem</i>        | 0.88                                      | 0.29                                  | 0.23                               | 0.11                                                   | 0.05                                                   | 0.09                                    | 0.08                                        | 0.15                                            | 0.04                                  | 0.02                                    | 0.00                                      | 0.01                                      |
| <i>S. fuscum</i>            | 1.12                                      | 0.18                                  | 0.11                               | 0.13                                                   | 0.06                                                   | 0.04                                    | 0.05                                        | 0.10                                            | 0.02                                  | 0.02                                    | 0.00                                      | 0.00                                      |
| <i>S. angustifolium</i>     | 1.18                                      | 0.15                                  | 0.15                               | 0.10                                                   | 0.04                                                   | 0.07                                    | 0.06                                        | 0.11                                            | 0.02                                  | 0.02                                    | -0.01                                     | 0.00                                      |
| <i>S. magellanicum</i>      | 1.08                                      | 0.19                                  | 0.14                               | 0.11                                                   | 0.06                                                   | 0.08                                    | 0.06                                        | 0.10                                            | 0.04                                  | 0.02                                    | -0.01                                     | 0.00                                      |
| <i>E. vaginatum</i>         | 1.04                                      | 0.35                                  | 0.17                               | 0.13                                                   | 0.08                                                   | 0.05                                    | 0.05                                        | 0.08                                            | 0.00                                  | 0.00                                    | 0.01                                      | 0.01                                      |
| Lichen                      | 0.99                                      | 0.23                                  | 0.11                               | 0.16                                                   | 0.08                                                   | 0.01                                    | 0.06                                        | 0.10                                            | 0.02                                  | 0.01                                    | 0.00                                      | 0.00                                      |
| Peat                        |                                           |                                       |                                    |                                                        |                                                        |                                         |                                             |                                                 |                                       |                                         |                                           |                                           |
| Palsa 1-5cm                 | 0.90                                      | 0.25                                  | 0.11                               | 0.16                                                   | 0.10                                                   | 0.04                                    | 0.07                                        | 0.09                                            | 0.05                                  | 0.02                                    | 0.00                                      | 0.00                                      |
| Palsa 10-14cm               | 0.80                                      | 0.25                                  | 0.10                               | 0.24                                                   | 0.17                                                   | 0.03                                    | 0.06                                        | 0.09                                            | 0.04                                  | 0.02                                    | 0.00                                      | 0.00                                      |
| Bag 1-5cm                   | 1.14                                      | 0.18                                  | 0.15                               | 0.07                                                   | 0.02                                                   | 0.08                                    | 0.08                                        | 0.08                                            | 0.06                                  | 0.06                                    | 0.00                                      | 0.00                                      |
| Bag 10-14cm                 | 0.93                                      | 0.18                                  | 0.12                               | 0.10                                                   | 0.05                                                   | 0.08                                    | 0.08                                        | 0.07                                            | 0.06                                  | 0.03                                    | 0.00                                      | 0.00                                      |
| Fen 1-5cm                   | 0.91                                      | 0.28                                  | 0.16                               | 0.15                                                   | 0.09                                                   | 0.08                                    | 0.07                                        | 0.06                                            | 0.04                                  | 0.02                                    | 0.00                                      | 0.00                                      |
| Fen 10-14cm                 | 0.83                                      | 0.27                                  | 0.14                               | 0.17                                                   | 0.11                                                   | 0.08                                    | 0.07                                        | 0.06                                            | 0.05                                  | 0.02                                    | 0.00                                      | 0.00                                      |

614 Supplemental Table 2: Normalized, baseline-corrected peak heights of major functionalities in the FT-IR  
 615 spectra of the plants and peat from the different habitats. Peak heights are calculated according to  
 616 modifications of Hodgkins et al., (2018) and reported as absorbance × 10<sup>3</sup>. Wavenumber assignment of  
 617 functionalities is based on that given in Palozzi and Lindo (2017).  
 618

619

620

## Running head: Peatland plants influence soil organic matter

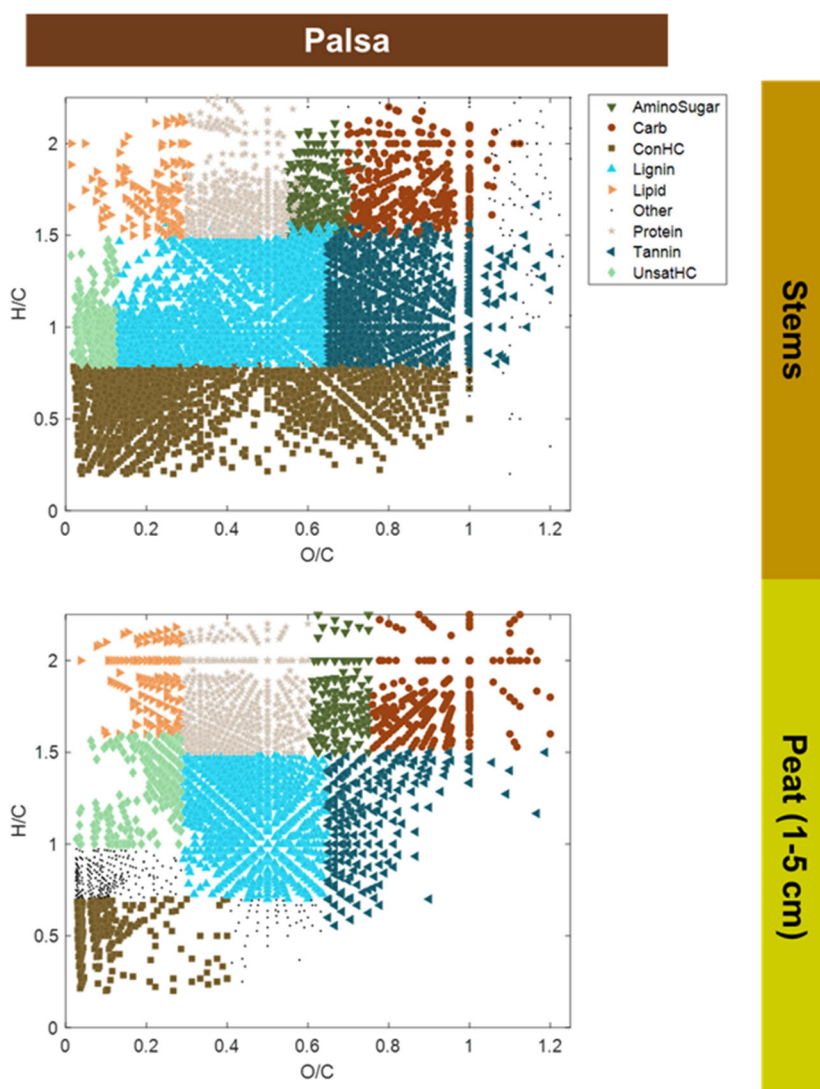

621

622 Supplemental Figure 1: Comparing compounds observed in the plant stem extracts from palsa to those  
623 in the palsa peat. Symbols are color-coded according to major chemical classes as inferred from the  
624 FTICR-MS-derived molecular formulae. Stems were only analyzed in the palsa so bog and fen are not  
625 included.

626

## Running head: Peatland plants influence soil organic matter

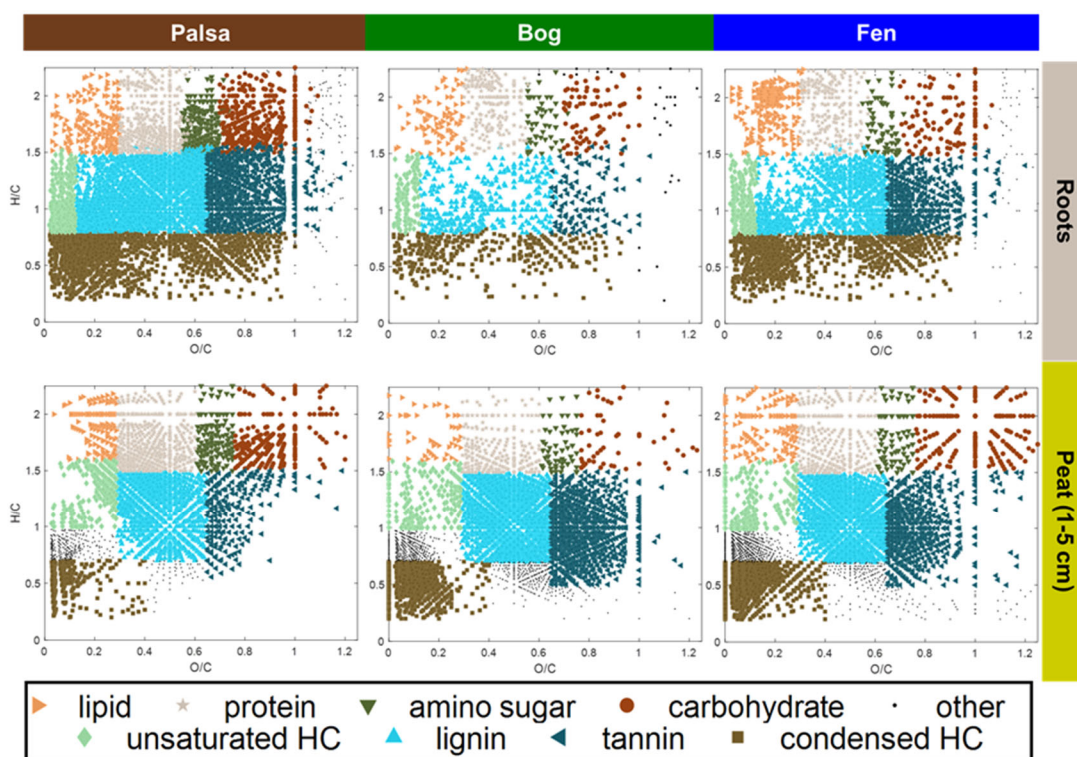

**Running head:** Peatland plants influence soil organic matter

- 645 Ballance, S., Børsheim, K. Y., Inngjerdingen, K., Paulsen, B. S., & Christensen, B. E. (2007). A re-  
646 examination and partial characterisation of polysaccharides released by mild acid hydrolysis  
647 from the chlorite-treated leaves of *Sphagnum papillosum*. *Carbohydrate polymers*, 67(1), 104-  
648 115.
- 649 Blanc-Betes, E., Welker, J.M., Sturchio, N.C., Chanton, J.P. and Gonzalez-Meler, M.A., (2016). Winter  
650 precipitation and snow accumulation drive the methane sink or source strength of Arctic  
651 tussock tundra. *Global Change Biology*, 22(8), pp.2818-2833.
- 652 Bragazza, L., Freeman, C., Jones, T., Rydin, H., Limpens, J., Fenner, N., ... & Toberman, H. (2006).  
653 Atmospheric nitrogen deposition promotes carbon loss from peat bogs. *Proceedings of the*  
654 *National Academy of Sciences*, 103(51), 19386-19389.
- 655 Casals, P., Gimeno, C., Carrara, A., Lopez-Sangil, L., & Sanz, M. (2009). Soil CO<sub>2</sub> efflux and extractable  
656 organic carbon fractions under simulated precipitation events in a Mediterranean Dehesa. *Soil*  
657 *Biology and Biochemistry*, 41(9), 1915-1922.
- 658 Casals, P., Lopez-Sangil, L., Carrara, A., Gimeno, C., & Nogués, S. (2011). Autotrophic and heterotrophic  
659 contributions to short-term soil CO<sub>2</sub> efflux following simulated summer precipitation pulses in  
660 a Mediterranean dehesa. *Global Biogeochemical Cycles*, 25(3).
- 661 Chang, K. Y., W. J. Riley, S. H. Knox, R. B. Jackson, G. McNicol, B. Poulter, M. Aurela, D. Baldocchi, S.  
662 Bansal, G. Bohrer, D. I. Campbell, A. Cescatti, H. Chu, K. B. Delwiche, A. Desai, E. Euskirchen, T.  
663 Friborg, M. Goeckede, G. Holm, M. Kang, T. Keenan, K. W. Krauss, A. Lohila, I. Mammarella, A.  
664 Miyata, M. B. Nilsson, A. Noormets, D. Papale, B. R. K. Runkle, Y. Ryu, T. Sachs, K. V. R. Schäfer,  
665 H. P. Schmid, N. Shurpali, O. Sonnentag, A. C. I. Tang, M. S. Torn, C. Trotta, M. Ueyama, R.  
666 Vargas, T. Vesala, L. Windham-Myers, Z. Zhang, and D. Zona (2021), Global wetland methane  
667 emissions have hysteretic responses to seasonal temperature *Nat Commun*,  
668 <https://doi.org/10.1038/s41467-021-22452-1>.
- 669 Chanton, J. P., Glaser, P. H., Chasar, L. S., Burdige, D. J., Hines, M. E., Siegel, D. I., ... & Cooper, W. T.  
670 (2008). Radiocarbon evidence for the importance of surface vegetation on fermentation and  
671 methanogenesis in contrasting types of boreal peatlands. *Global Biogeochemical Cycles*, 22(4).
- 672 Chapman, S.J., Campbell, C.D., Fraser, A.R. and Puri, G., (2001). FTIR spectroscopy of peat in and  
673 bordering Scots pine woodland: relationship with chemical and biological properties. *Soil*  
674 *Biology and Biochemistry*, 33(9), pp.1193-1200.
- 675 Christensen, T.R., (2014). Climate science: Understand Arctic methane variability. *Nature News*,  
676 509(7500), p.279.

**Running head:** Peatland plants influence soil organic matter

- 677 Clymo, R. S. (1987). The ecology of peatlands. *Science Progress (1933-)*, 593-614.
- 678 Coccozza, C., D'orazio, V., Miano, T.M. and Shotyk, W., (2003). Characterization of solid and aqueous  
679 phases of a peat bog profile using molecular fluorescence spectroscopy, ESR and FT-IR, and  
680 comparison with physical properties. *Organic Geochemistry*, 34(1), pp.49-60.
- 681 Coward, E. K., Ohno, T., & Plante, A. F. (2018). Adsorption and molecular fractionation of dissolved  
682 organic matter on iron-bearing mineral matrices of varying crystallinity. *Environmental science  
683 & technology*, 52(3), 1036-1044.
- 684 Curtin, D., Peterson, M.E. and Anderson, C.R., (2016). pH-dependence of organic matter solubility: Base  
685 type effects on dissolved organic C, N, P, and S in soils with contrasting mineralogy. *Geoderma*,  
686 271, 161-172.
- 687 Elberling, B., Kühl, M., Glud, R.N., Jørgensen, C.J., Askaer, L., Rickelt, L.F., Joensen, H.P., Larsen, M. and  
688 Liengaard, L., (2013). Methods to Assess High-Resolution Subsurface Gas Concentrations and  
689 Gas Fluxes in Wetland Ecosystems. *Methods in Biogeochemistry of Wetlands*, 10, pp.949-970.
- 690 Euskirchen, E. S., Bret-Harte, M. S., Scott, G. J., Edgar, C., & Shaver, G. R. (2012). Seasonal patterns of  
691 carbon dioxide and water fluxes in three representative tundra ecosystems in northern Alaska.  
692 *Ecosphere*, 3(1), 1-19.
- 693 Freeman C, Ostle N, Kang H. (2001). An enzymic 'latch' on a global carbon store - A shortage of oxygen  
694 locks up carbon in peatlands by restraining a single enzyme. *Nature* 409:149-149.
- 695 Fudyma, J.D., Lyon, J., AminiTabrizi, R., Gieschen, H., Chu, R.K., Hoyt, D.W., Kyle, J.E., Toyoda, J., Tolic,  
696 N., Heyman, H.M. and Hess, N.J., (2019). Untargeted metabolomic profiling of *Sphagnum fallax*  
697 reveals novel antimicrobial metabolites. *Plant direct*, 3(11), p.e00179.
- 698 Graham, E.B., Tfaily, M.M., Crump, A.R., Goldman, A.E., Bramer, L.M., Arntzen, E., Romero, E., Resch,  
699 C.T., Kennedy, D.W. and Stegen, J.C., (2017). Carbon inputs from riparian vegetation limit  
700 oxidation of physically bound organic carbon via biochemical and thermodynamic processes.  
701 *Journal of Geophysical Research: Biogeosciences*, 122(12), pp.3188-3205.
- 702 Guigue, J., Mathieu, O., Lévêque, J., Mounier, S., Laffont, R., Maron, P. A., ... & Lucas, Y. (2014). A  
703 comparison of extraction procedures for water-extractable organic matter in soils. *European  
704 Journal of Soil Science*, 65(4), 520-530.
- 705 Gunther, A. (1989). Nitrogen Fixation by Lichens in a Subarctic Alaskan Watershed. *The Bryologist*,  
706 92(2), 202-208. doi:10.2307/3243946



**Running head:** Peatland plants influence soil organic matter

- 707 Hanson, P. J., Griffiths, N. A., Iversen, C. M., Norby, R. J., Sebestyen, S. D., Phillips, J. R., ... & Ricciuto, D.  
708 M. (2020). Rapid net carbon loss from a whole-ecosystem warmed Peatland. *AGU Advances*,  
709 1(3), e2020AV000163.
- 710 Hicks-Pries, C.E., Schuur, E.A.G., Natali, S.M. and Vogel, J.G., (2013). Moisture controls decomposition  
711 rate in thawing tundra. *Journal of Geophysical Research-Biogeosciences*, (18), pp.1-11.
- 712 Hines ME, Duddleston KN, Rooney-Varga JN, Fields D, Chanton JP. (2008) Uncoupling of acetate  
713 degradation from methane formation in Alaskan wetlands: connections to vegetation  
714 distribution. *Global Biogeochemical Cycles*, 22(2).
- 715 Hodgkins, S. B., Tfaily, M. M., McCalley, C. K., Logan, T. A., Crill, P. M., Saleska, S. R., Rich, V. I., and  
716 Chanton, J. P. (2014), Changes in peat chemistry associated with permafrost thaw increase  
717 greenhouse gas production, *Proceedings of the National Academy of Sciences of the United*  
718 *States of America*, 111(16), 5819–24, doi:10.1073/pnas.1314641111.
- 719 Hodgkins SB, Tfaily MM, Podgorski DC, McCalley CK, Saleska SR, Crill PM, Rich VI, Chanton JP, Cooper  
720 WT. (2016). Elemental composition and optical properties reveal changes in dissolved organic  
721 matter along a permafrost thaw chronosequence in a subarctic peatland. *Geochimica et*  
722 *Cosmochimica Acta* 187:123-140.
- 723 Hodgkins, S. B., Richardson, C. J., Dommain, R., Wang, H., Glaser, P. H., Verbeke, B., ... & Chanton, J. P.  
724 (2018). Tropical peatland carbon storage linked to global latitudinal trends in peat recalcitrance.  
725 *Nature communications*, 9(1), 1-13.
- 726 Hopple, A. M., Wilson, R. M., Kolton, M., Zalman, C. A., Chanton, J. P., Kostka, J., ... & Bridgham, S. D.  
727 (2020). Massive peatland carbon banks vulnerable to rising temperatures. *Nature*  
728 *communications*, 11(1), 1-7.
- 729 Hough, M., McClure, A., Bolduc, B., Dorrepaal, E., Saleska, S., Klepac-Ceraj, V. and Rich, V., (2020). Biotic  
730 and environmental drivers of plant microbiomes across a permafrost thaw gradient. *Frontiers*  
731 *in Microbiology*, 11, p.796.
- 732 Hough, M., McCabe, S., Vining, S.R., Pedersen, E.P., Wilson, R., Lawrence, R., et al., (under review)  
733 Changing plant litter quantity and quality drive C storage in a thawing permafrost peatland.  
734 *Global Change Biology*, companion paper.
- 735 Hugelius, G., Strauss, J., Zubrzycki, S., Harden, J. W., Schuur, E. A. G., Ping, C. L., ... & Kuhry, P. (2014).  
736 Estimated stocks of circumpolar permafrost carbon with quantified uncertainty ranges and  
737 identified data gaps. *Biogeosciences*, 11(23), 6573-6593.

**Running head:** Peatland plants influence soil organic matter

- 738 Hugelius, G., Loisel, J., Chadburn, S., Jackson, R. B., Jones, M., MacDonald, G., ... & Yu, Z. (2020). Large  
739 stocks of peatland carbon and nitrogen are vulnerable to permafrost thaw. *Proceedings of the*  
740 *National Academy of Sciences*, 117(34), 20438-20446.
- 741 Johansson T, Malmer N, Crill PM, Friborg T, Aakerman JH, Mastepanov M, Christensen TR. (2006)  
742 Decadal vegetation changes in a northern peatland, greenhouse gas fluxes and net radiative  
743 forcing. *Global Change Biology*. Dec;12(12):2352-69.
- 744 Jones, M.C., Booth, R.K., Yu, Z. and Ferry, P., (2013). A 2200-year record of permafrost dynamics and  
745 carbon cycling in a collapse-scar bog, interior Alaska. *Ecosystems*, 16(1), pp.1-19.
- 746 Jorgenson, M. T., Racine, C. H., Walters, J. C. & Osterkamp, T. E. (2001) Permafrost degradation and  
747 ecological changes associated with a warming climate in central Alaska. *Climate Change* 48,  
748 551–579.
- 749 Keiluweit, M., Nico, P. S., Kleber, M., and Fendorf, S. (2016), Are oxygen limitations under recognized  
750 regulators of organic carbon turnover in upland soils?, *Biogeochemistry*, 127(2), 157–171,  
751 doi:10.1007/s10533-015-0180-6.
- 752 Kokfelt, U., Rosén, P., Schoning, K., Christensen, T. R., Förster, J., Karlsson, J., ... & Hammarlund, D.  
753 (2009). Ecosystem responses to increased precipitation and permafrost decay in subarctic  
754 Sweden inferred from peat and lake sediments. *Global Change Biology*, 15(7), 1652-1663.
- 755 Kujawinski EB, Behn MD. (2006) Automated analysis of electrospray ionization Fourier transform ion  
756 cyclotron resonance mass spectra of natural organic matter. *Analytical Chemistry*,  
757 1;78(13):4363-73.
- 758 Kujawinski, E.B., Longnecker, K., Barott, K.L., Weber, R.J. and Kido Soule, M.C., (2016). Microbial  
759 community structure affects marine dissolved organic matter composition. *Frontiers in Marine*  
760 *Science*, 3, p.45.
- 761 Lal, R. (2010) Managing Soils and Ecosystems for Mitigating Anthropogenic Carbon Emissions and  
762 Advancing Global Food Security. *BioScience* 60, 708–721.
- 763 LaRowe, D. E., and Van Cappellen, P. (2011), Degradation of natural organic matter: A thermodynamic  
764 analysis, *Geochimica et Cosmochimica Acta*, 75(8), 2030–2042, doi:10.1016/j.gca.2011.01.020.
- 765 Leifeld, J., M. Steffens, and A. Galego-Sala. (2012) Sensitivity of peatland carbon loss to organic matter  
766 quality. *Geophysical Research Letters*, 39: L14704
- 767 Leifeld, J., Klein, K., and Wust-Galley, C. (2020) Soil organic matter stoichiometry as indicator for  
768 peatland degradation. *Scientific Reports* 10, 7634

**Running head:** Peatland plants influence soil organic matter

- 769 Malhotra, A., Brice, D. J., Childs, J., Graham, J. D., Hobbie, E. A., Vander Stel, H., ... & Iversen, C. M.  
770 (2020). Peatland warming strongly increases fine-root growth. *Proceedings of the National*  
771 *Academy of Sciences*, 117(30), 17627-17634.
- 772 Malmer N, Johansson T, Olsrud M, Christensen TR. (2005) Vegetation, climatic changes and net carbon  
773 sequestration in a North-Scandinavian subarctic mire over 30 years. *Global Change Biology*,  
774 11(11):1895-909.
- 775 McCalley CK, Woodcroft BJ, Hodgkins SB, Wehr RA, Kim EH, Mondav R, Crill PM, Chanton JP, Rich VI,  
776 Tyson GW, Saleska SR. (2014) Methane dynamics regulated by microbial community response  
777 to permafrost thaw. *Nature* 514:478-
- 778 McPartland, M.Y., Montgomery, R.A., Hanson, P.J., Phillips, J.R., Kolka, R. and Palik, B., (2020). Vascular  
779 plant species response to warming and elevated carbon dioxide in a boreal peatland.  
780 *Environmental Research Letters*, 15(12), p.124066.
- 781 Megonigal, J.P., Hines, M.E. and Visscher, P.T., (2004). Anaerobic metabolism: linkages to trace gases  
782 and aerobic processes. *Biogeochemistry*.
- 783 Minor EC, Steinbring CJ, Longnecker K, Kujawinski EB. (2012) Characterization of dissolved organic  
784 matter in Lake Superior and its watershed using ultrahigh resolution mass spectrometry.  
785 *Organic Geochemistry*, 1;43:1-1.
- 786 Natali, S.M., Schuur, E.A. and Rubin, R.L., (2012). Increased plant productivity in Alaskan tundra as a  
787 result of experimental warming of soil and permafrost. *Journal of Ecology*, 100(2), pp.488-498.
- 788 Natali, S.M., Schuur, E.A., Mauritz, M., Schade, J.D., Celis, G., Crummer, K.G., Johnston, C., Krapek, J.,  
789 Pegoraro, E., Salmon, V.G. and Webb, E.E., (2015). Permafrost thaw and soil moisture driving  
790 CO<sub>2</sub> and CH<sub>4</sub> release from upland tundra. *Journal of Geophysical Research: Biogeosciences*,  
791 120(3), pp.525-537.
- 792 Nichols, J. E., and Peteet, D. M. (2019), Rapid expansion of northern peatlands and doubled estimate of  
793 carbon storage, *Nature Geoscience*, 12(11), 917-921, doi:10.1038/s41561-019-0454-z.
- 794 Norby RJ, Edwards NT, Riggs JS, Abner CH, Wullschleger SD, Gunderson CA. (1997). Temperature-  
795 controlled open-top chambers for global change research. *Global Change Biology* 3:259-267.
- 796 O'Donnell, J. A., Harden, J. W., McGuire, A. D., Kanevskiy, M. Z., Jorgenson, M. T., & Xu, X. (2011). The  
797 effect of fire and permafrost interactions on soil carbon accumulation in an upland black spruce  
798 ecosystem of interior Alaska: implications for post-thaw carbon loss. *Global Change*  
799 *Biology*, 17(3), 1461-1474.

**Running head:** Peatland plants influence soil organic matter

- 800 Painter, T.J., (1991). Lindow man, Tollund man and other peat-bog bodies: the preservative and  
801 antimicrobial action of Sphagnan, a reactive glycuronoglycan with tanning and sequestering  
802 properties. *Carbohydrate Polymers*, 15(2), pp.123-142.
- 803 Palozzi, J.E. and Z. Lindo (2017) Boreal peat properties link to plant functional traits of ecosystem  
804 engineers. *Plant Soil* 418:277-291
- 805 Rintoul, S.R., Chown, S.L., DeConto, R.M., England, M.H., Fricker, H.A., Masson-Delmotte, V., Naish, T.R.,  
806 Siegert, M.J. and Xavier, J.C., (2018). Choosing the future of Antarctica. *Nature*, 558(7709),  
807 pp.233-241.
- 808 Rodwell JS (1991) *British Plant Communities*. Vol. 2. Mires and Heaths. Cambridge University Press,  
809 Cambridge
- 810 Rudolph, H. and Samland, J., (1985). Occurrence and metabolism of sphagnum acid in the cell walls of  
811 bryophytes. *Phytochemistry*, 24(4), pp.745-749.
- 812 Schädel, C., Bader, M. K. F., Schuur, E. A., Biasi, C., Bracho, R., Čapek, P., ... & Wickland, K. P. (2016).  
813 Potential carbon emissions dominated by carbon dioxide from thawed permafrost soils. *Nature*  
814 *climate change*, 6(10), 950-953.
- 815 Sinsabaugh, R.L., (2010). Phenol oxidase, peroxidase and organic matter dynamics of soil. *Soil Biology*  
816 *and Biochemistry*, 42(3), pp.391-404. Thorn et al., 1992
- 817 Spearing, A.M. (1972) Cation-exchange capacity and galacturonic acid content of several species of  
818 Sphagnum in Sandy Ridge Bog, central New York State. *The Bryologist*, 75, 154–158.
- 819 Stenson, A. C., Marshall, A. G., & Cooper, W. T. (2003). Exact masses and chemical formulas of  
820 individual Suwannee River fulvic acids from ultrahigh resolution electrospray ionization Fourier  
821 transform ion cyclotron resonance mass spectra. *Analytical chemistry*, 75(6), 1275-1284.
- 822 Sutton-Grier, A.E. and Megonigal, J.P., (2011). Plant species traits regulate methane production in  
823 freshwater wetland soils. *Soil Biology and Biochemistry*, 43(2), pp.413-420.
- 824 Tarnocai, C., Canadell, J.G., Schuur, E.A., Kuhry, P., Mazhitova, G. and Zimov, S., (2009). Soil organic  
825 carbon pools in the northern circumpolar permafrost region. *Global biogeochemical cycles*,  
826 23(2).
- 827 Tfaily MM, Hamdan R, Corbett JE, Chanton JP, Glaser PH, Cooper WT. (2013). Investigating dissolved  
828 organic matter decomposition in northern peatlands using complimentary analytical  
829 techniques. *Geochimica Et Cosmochimica Acta* 112:116-129.

**Running head:** Peatland plants influence soil organic matter

- 830 Tfaily, M. M., Chu, R. K., Toyoda, J., Tolić, N., Robinson, E. W., Paša-Tolić, L., & Hess, N. J. (2017).  
831 Sequential extraction protocol for organic matter from soils and sediments using high  
832 resolution mass spectrometry. *Analytica chimica acta*, 972, 54-61.
- 833 Thorn, K. A., Arterburn, J. B., & Mikita, M. A. (1992). Nitrogen-15 and carbon-13 NMR investigation of  
834 hydroxylamine-derivatized humic substances. *Environmental science & technology*, 26(1), 107-  
835 116.
- 836 Thorn, K.A. and M.A. Mikita. (2000) Nitrite fixation by humic substances: nitrogen-15 nuclear magnetic  
837 resonance evidence for potential intermediates in chemodenitrification. *Soil Science Society of*  
838 *America* 64: 568-582
- 839 Thorn, K.A. and L.G. Cox (2016) Nitrosation and nitration of fulvic acid, peat and coal with nitric acid.  
840 *PLoS ONE* 11(5): e0154981
- 841
- 842 Treat, C.C., W.M. Wollheim, R.K. Varner, A.S. Grandy, J. Talbot and S. Frohling (2014) Temperature and  
843 peat type control CO<sub>2</sub> and CH<sub>4</sub> production in Alaskan permafrost peats. *Global Change Biology*  
844 20: 2674-2686.
- 845 Turetsky, M.R., (2003). The role of bryophytes in carbon and nitrogen cycling. *The bryologist*, 106(3),  
846 pp.395-409.
- 847 Turetsky, M.R., Wieder, R.K., Vitt, D.H., Evans, R.J. and Scott, K.D., (2007). The disappearance of relict  
848 permafrost in boreal north America: Effects on peatland carbon storage and fluxes. *Global*  
849 *Change Biology*, 13(9), pp.1922-1934.
- 850 Van Breeman, N. (1995) How Sphagnum bogs down other plants. *TREE* 10(7):270-275
- 851 Vitt, D. H., Halsey, L. A. & Zoltai, S. C. (1994) The bog landforms of continental western Canada in  
852 relation to climate and permafrost patterns. *Arctic. Alpine Research* 26, 1–13.
- 853 Walker, T.N., Garnett, M.H., Ward, S.E., Oakley, S., Bardgett, R.D. and Ostle, N.J.,(2016). Vascular plants  
854 promote ancient peatland carbon loss with climate warming. *Global Change Biology*, 22(5),  
855 pp.1880-1889.
- 856 Wang, H., Richardson, C. J., & Ho, M. (2015). Dual controls on carbon loss during drought in peatlands.  
857 *Nature Climate Change*, 5(6), 584-587.
- 858 Wang, H., Tian, J., Chen, H., Ho, M., Vilgalys, R., Bu, Z.J., Liu, X. and Richardson, C.J., (2021). Vegetation  
859 and microbes interact to preserve carbon in many wooded peatlands. *Communications Earth &*  
860 *Environment*, 2(1), pp.1-8.

**Running head:** Peatland plants influence soil organic matter

- 861 Wardle, D. A., Bardgett, R. D., Klironomos, J. N., Setälä, H., Van Der Putten, W. H., & Wall, D. H. (2004).  
862 Ecological linkages between aboveground and belowground biota. *Science*, 304(5677), 1629-  
863 1633.
- 864 Williams, C.J., Yavitt, J.B., Wieder, R.K. and Cleavitt, N.L., (1998). Cupric oxide oxidation products of  
865 northern peat and peat-forming plants. *Canadian Journal of Botany*, 76(1), pp.51-62.
- 866 Wilson, RM and MM Tfaily. (2018). Advanced molecular techniques provide new rigorous tools for  
867 characterizing organic matter quality in complex systems. 2018. *JGR: Biogeosciences*, 123,  
868 1790-1795.
- 869 Wilson, R. M., Tfaily, M. M., Rich, V. I., Keller, J. K., Bridgham, S. D., Zalman, C. M., ... & Kostka, J. E.  
870 (2017). Hydrogenation of organic matter as a terminal electron sink sustains high CO<sub>2</sub>: CH<sub>4</sub>  
871 production ratios during anaerobic decomposition. *Organic Geochemistry*, 112, 22-32.
- 872 Wilson, R. M., Tfaily, M. M., Kolton, M., Johnston, E. R., Petro, C., Zalman, C. A., ... & Kostka, J. E.  
873 (2021a). Soil metabolome response to whole-ecosystem warming at the Spruce and Peatland  
874 Responses under Changing Environments experiment. *Proceedings of the National Academy of*  
875 *Sciences*, 118(25).
- 876 Wilson, R.M., Zayed, A.A., Crossen, K.B., Woodcroft, B., Tfaily, M.M., Emerson, J., Raab, N., Hodgkins,  
877 S.B., Verbeke, B., Tyson, G. and Crill, P., (2021b). Functional capacities of microbial communities  
878 to carry out large scale geochemical processes are maintained during ex situ anaerobic  
879 incubation. *PloS one*, 16(2), p.e0245857.
- 880 Woodcroft BJ, Singleton CM, Boyd JA, Evans PN, Emerson JB, Zayed AA, Hoelzle RD, Lamberton TO,  
881 McCalley CK, Hodgkins SB, Wilson RM. et al., (2018) Genome-centric view of carbon processing  
882 in thawing permafrost. *Nature*, 560(7716):49-54.
- 883 Zoltai, S. C. (1993) Cyclic development of permafrost in the peatlands of Northwestern Alberta, Canada.  
884 *Arctic. Alpine Research* 25, 240–246.
- 885
- 886
